## **Subcellular spatial transcriptomics identifies three mechanistically different classes of localizing RNAs**

Lucia Cassella<sup>1,2</sup> and Anne Ephrussi<sup>1\*</sup>

<sup>1</sup>European Molecular Biology Laboratory, Meyerhofstrasse 1, Heidelberg, 69117, Germany

<sup>2</sup>Collaboration for joint PhD degree between EMBL and Heidelberg University, Faculty of Biosciences

\*corresponding author, [anne.ephrussi@embl.org](mailto:anne.ephrussi@embl.org)

1 **Abstract**

2 Intracellular RNA localization is a widespread and dynamic phenomenon that compartmentalizes gene  
3 expression and contributes to the functional polarization of cells. Thus far, mechanisms of RNA  
4 localization identified in *Drosophila* have been based on a few RNAs in different tissues, and a  
5 comprehensive mechanistic analysis of RNA localization in a single tissue is lacking. Here, by  
6 subcellular spatial transcriptomics we identify RNAs localized in the apical and basal domains of the  
7 columnar follicular epithelium (FE) and we analyze the mechanisms mediating their localization.  
8 Whereas the dynein/BicD/Egl machinery controls apical RNA localization, basally-targeted RNAs  
9 require kinesin-1 to overcome a “default” dynein-mediated transport. Moreover, a non-canonical,  
10 translation- and dynein-dependent mechanism mediates apical localization of a subgroup of dynein-  
11 activating adaptor RNAs (*BicD*, *Bsg25D*, *hook*). Altogether, our study identifies at least three  
12 mechanisms underlying RNA localization in the FE, and suggests a possible link between RNA  
13 localization and dynein/dynactin/adaptor complex formation *in vivo*.

14

## 15 INTRODUCTION

16 RNA localization allows the precise compartmentalization of gene expression in space and time, and  
17 is a widespread phenomenon in many different cell types and organisms (Shepard et al., 2003;  
18 Blower et al., 2007; Lécuyer et al., 2007; Mili et al., 2008; Jambor et al., 2015; Wilk  
19 et al., 2016; Moor et al., 2017). Three main mechanisms have been described to account for RNA  
20 localization: (1) active transport on cytoskeletal tracks, (2) localized protection from degradation, or (3)  
21 facilitated diffusion and entrapment (Medioni et al., 2012). Recently, several novel mechanisms have  
22 been reported to mediate RNA localization, such as hitch-hiking on other RNAs or organelles and co-  
23 translational RNA transport (Corradi et al., 2020; Cioni et al., 2019; Liao et al., 2019; Baumann et al.,  
24 2014; Harbauer et al., 2021; Cohen et al., 2021; Sepulveda et al., 2018). Active transport is the best  
25 characterized mode of RNA localization and consists in the transport of ribonucleoprotein particles by  
26 motor proteins on cytoskeletal tracks. Localizing RNAs are typically transported in a translationally  
27 silent state and encode cis-acting localization elements (LEs) that are recognized and bound by trans-  
28 acting RNA-binding proteins (RBPs) mediating motor recruitment (Xing & Bassell, 2013).

29  
30 Kinesin motor proteins mostly mediate microtubule (MT) plus end-directed transport. Kinesin-1 (Khc)  
31 has been shown to mediate *oskar* (*osk*) RNA localization to the posterior pole of the *Drosophila* oocyte  
32 (Brendza et al., 2000; Zimyanin et al., 2008). Whereas Tropomyosin-1 isoform I/C (atypical Tm1,  
33  $\alpha$ Tm1) regulates *osk* posterior localization by directly stabilizing Khc interaction with the RNA  
34 (Dimitrova-Paternoga et al., 2021; Gáspár et al., 2016; Erdélyi et al., 1995), the Exon Junction  
35 Complex (EJC) deposited upon splicing is thought to activate kinesin-1 transport of the RNA (Gáspár  
36 et al., 2016). Little is known about MT plus end-directed RNA transport in other tissues. Interestingly,  
37  $\alpha$ Tm1 is also important for *coracle* RNA localization at *Drosophila* neuromuscular junctions (Gardiol &  
38 St Johnston, 2014) and the EJC has been shown to mediate *NIN* RNA localization in human RPE1  
39 cells (Kwon et al., 2021).

40  
41 Cytoplasmic dynein and its accessory complex dynactin direct trafficking of cargoes towards MT  
42 minus ends. In *Drosophila*, dynein-mediated RNA transport is accomplished by the dynein-activating  
43 adaptor Bicaudal-D (BicD) and the RNA binding protein Egalitarian (Egl) (Mach & Lehmann, 1997;  
44 Navarro et al., 2004; Dienstbier et al., 2009). The dynein/BicD/Egl complex is thought to mediate

45 nurse cell-to-oocyte transport of maternal RNAs, and was shown to direct apical RNA localization in  
46 the early embryo, neuroblasts, and polar cells (Clark et al., 2007; Wilkie & Davis, 2001; Bullock & Ish-  
47 Horowicz, 2001; Hughes et al., 2004; Van De Bor et al., 2011). The dynein/dynactin/BicD (DDB) motor  
48 complex is highly conserved and participates in the transport of different cargoes, with BicD (and its  
49 mammalian ortholog BICD2) linking the dynein motor to specific cargoes. While proteins binding to the  
50 BicD C-terminal domain (CTD), such as Egl or Rab6, impart cargo specificity (Matanis et al., 2002;  
51 Hoogenraad et al., 2003; Dienstbier et al., 2009; Coutelis & Ephrussi 2007; Januschke et al., 2007),  
52 the BicD N-terminal domain (corresponding to coiled-coil 1/2, CC1/2) binds to dynein/dynactin  
53 (Hoogenraad et al., 2001, 2003) and activates dynein processivity (McKenney et al., 2014; Schlager et  
54 al., 2014; Dienstbier et al., 2009; Sladewski et al., 2018).

55

56 Although much of what is known about RNA localization comes from studies of maternally inherited  
57 RNAs in the *Drosophila* germline, several examples of localizing RNAs have been also reported in the  
58 follicular epithelium (FE) that envelops the germline cyst (Jambor et al., 2015; Li et al., 2008; Horne-  
59 Badovinac & Bilder, 2008; Vazquez-Pianzola et al., 2017; Schotman et al., 2008; Serano & Rubin,  
60 2003). The FE is composed of highly polarized secretory follicle cells (FCs) belonging to the somatic  
61 lineage, with minus ends of non-centrosomal microtubules (ncMTs) anchored at the apical cell cortex  
62 facing the oocyte (Clark et al., 1997; Khanal et al., 2016). The FE is an easily manipulatable and  
63 powerful genetic system that, through the generation of mosaics, allows the dissection of the effect of  
64 mutations without disrupting developmental processes. Several lines of evidence indicate that the  
65 dynein/BicD/Egl RNA transport complex active in nurse cell-to-oocyte transport is also responsible for  
66 the apical localization of a handful of RNAs in the FE (Li et al., 2008; Bhagavatula & Knust, 2021;  
67 Karlin-McGinness et al., 1996; Jambor et al., 2014; Vazquez-Pianzola et al., 2017; Van De Bor et al.,  
68 2011). However, a comprehensive overview of RNA localization in the FE and its underlying  
69 mechanisms are lacking.

70

71 Here, we apply subcellular spatial transcriptomics to first identify the landscape of apically- and  
72 basally-localizing RNAs in the columnar FE. By screening a subset of apical and basal RNAs identified  
73 in this way, we find that the dynein/BicD/Egl machinery acts by “default” in directing apical RNA  
74 localization, and that an additional kinesin-1-dependent layer of regulation must be applied to direct



75 basal RNA localization. Moreover, we identify a third, translation- and dynein-dependent mechanism  
76 that underlies the apical localization of transcripts encoding dynein-activating adaptors, providing a  
77 possible link between RNA localization and dynein/dynactin/adaptor complex formation *in vivo*.  
78

## 79 RESULTS

80

### 81 Identification of apical and basal RNAs in columnar follicle cells

82 To identify RNAs that localize apically or basally in *Drosophila* FE transcriptome-wide, we applied  
83 laser-capture microdissection (LCM) to isolate fragments of tissue that consisted in either the apical  
84 half (“apical domain”) or basal half (“basal domain”) of adjacent columnar follicle cells (**Figure 1A and**  
85 **Movie S1**). Differential gene expression analysis of apical vs. basal LCM-derived RNA-seq samples  
86 yielded 306 RNAs enriched in the apical samples and 249 RNAs enriched in the basal samples (false  
87 discovery rate [FDR] < 0.1) (**Figure 1B**). Since LCM is highly susceptible to tissue contamination, we  
88 first aimed at identifying those RNAs whose significant enrichment was a result of contamination by  
89 other cell types, such as the oocyte on the apical side or the circular muscles on the basal side  
90 (**Figure S1A**). To do so, we analyzed those RNAs characterized by high absolute log<sub>2</sub>-transformed  
91 fold change ( $|\log_2FC|$ ) values of apical over basal abundance that might result from contamination of  
92 neighboring tissues expressing a different set of hallmark genes. By setting an arbitrary threshold of  
93  $|\log_2FC| > 3$  as indicative of contaminant RNA identity, we found 33 putative basal contaminants of  
94 muscle origin ( $\log_2FC < -3$ ) and 2 putative apical contaminants of oocyte origin ( $\log_2FC > 3$ ) (**Figure**  
95 **1B and Figure S1B**). 2/3 ( $n=22$ ) of basal genes with  $\log_2FC < -3$  were annotated as being expressed  
96 or having a function in muscle tissues (FlyBase) and their mapped reads were often absent or in very  
97 low number in the apical fragments (**Figure S1C,D**). Moreover, we validated through single molecule  
98 Fluorescence *In Situ* Hybridization (smFISH) 3 putative basal contaminants (*Mhc*, *Act57B*, *wupA*) as  
99 being enriched in circular muscles with little or no expression in the FE (**Figure S1E**). This analysis  
100 resulted in 304 *bona fide* apical RNAs and 216 *bona fide* basal RNAs localizing in the columnar FE  
101 (**Figure 1B, Table S1**). Finally, 16 RNAs were randomly chosen from the computationally established  
102 list of significantly enriched *bona fide* apical or basal RNAs and were validated as true localizing RNAs  
103 through smFISH (**Figure 1C**).

104

### 105 Basal RNA localization depends on kinesin-1, aTm1, and the EJC

106 Basal RNA localization is a largely uncharacterized phenomenon. Previous reports have identified a  
107 limited number of basally-localizing RNAs in the FE (Jambor et al., 2015; Schotman et al., 2008;  
108 Serano & Rubin, 2003), with little mechanistic insight. For this reason, we sought to elucidate the

109 mechanisms behind basal RNA localization. Early reporter-based studies on the polarity of *Drosophila*  
110 tissues have shown that the basal domain of the FE is functionally equivalent to the posterior pole of  
111 the oocyte, as both compartments accumulate the MT plus end marker Kin:βgal (Clark et al., 1997).  
112 Therefore, we hypothesized that the regulators of *oskar* posterior RNA transport might also be  
113 responsible for basal RNA localization in the FE. To test this hypothesis, we disrupted known  
114 components of the *osk* RNP transport machinery, such as kinesin-1 (Khc), atypical Tropomyosin-1  
115 (*aTm1*) and the Exon Junction Complex (EJC) (**Figure S2A**) in the FE and analyzed the localization  
116 pattern of 4 validated basal RNAs (*Fkbp14*, *CG3308*, *Rtnl1*, *zip*) (**Figure 2**). In all cells lacking either  
117 Khc (*Khc* RNAi cells) (**Figure 2A**), *aTm1* (*Tm1<sup>NULL</sup>*, Erdélyi et al., 1995) (**Figure 2B**), or the EJC ( $\Delta C$ -  
118 *Pym* cells, Ghosh et al., 2014) (**Figure 2C**), basal RNA localization was severely disrupted, with all  
119 basal RNAs analyzed becoming apically localized. To check whether the changes observed in RNA  
120 localization were specific of basal RNAs, we analyzed the localization pattern of 4 apical RNAs  
121 validated previously (*crb*, *msps*, *qtc*, *CG33129*) in the same mutants. In contrast to basal RNAs, none  
122 of the apical RNAs analyzed were affected by disruption of kinesin-1-mediated RNA transport (**Figure**  
123 **S2B-D**), indicating that regulators of RNA transport towards MT plus ends specifically control basal  
124 RNA localization. To have a quantitative overview of changes in RNA localization, we considered the  
125 ratio between the apical and the basal smFISH signal intensity in either wild-type (wt) or knock-down  
126 (KD) cells, and called this parameter Degree of Apicality (DoA), as values > 1 indicate an apical  
127 localization bias. Then, we tested whether the DoA values of each RNA analyzed significantly differ in  
128 KD vs. wt cells by calculating the ratio between the DoA(KD) and the DoA(wt) for each RNA in each of  
129 the 3 conditions (see Materials and Methods and Figure 2 for statistical testing). With this analysis, we  
130 confirmed that (1) all basal RNAs were affected by lack of Khc, *aTm1*, or EJC and (2) none of the  
131 apical RNAs significantly changed localization pattern upon knock-down of kinesin-1 regulators  
132 (**Figure 2D**), showing that kinesin-1, *aTm1*, and the EJC are specifically responsible for basal RNA  
133 localization in the FE.

134

### 135 **Mislocalization of the basal RNA *zip* depends on Egalitarian**

136 Interestingly, upon disruption of MT plus end-directed RNA transport all analyzed basal RNAs were  
137 mislocalized to the apical domain. Several studies reported that apical RNA localization depends on  
138 the BicD/Egl machinery, a dynein-dependent complex that localizes RNAs apically in the blastoderm

139 embryo and is thought to be responsible for nurse cell-to-oocyte transport of maternal RNAs.  
140 Therefore, the apical mislocalization of basal RNAs observed upon knock-down of kinesin-1 regulators  
141 might be due to apical RNA transport by the dynein/BicD/Egl machinery. To test this, we generated FC  
142 clones lacking either Egl (*egl* RNAi) or Khc (*Khc* RNAi), or both Egl and Khc [(*egl+Khc*) RNAi] and  
143 evaluated changes in the RNA localization of *zip*, one of the most striking examples of the apical  
144 mislocalization phenomenon (see Figure 2A-C). Whereas *zip* RNA was unaffected upon *egl* RNAi and  
145 strongly apically mislocalized in *Khc* RNAi conditions as also highlighted by our previous experiments,  
146 (*egl+Khc*) RNAi caused *zip* to assume a ubiquitous localization that would be consistent with a failure  
147 of both kinesin-1-and dynein-mediated transport (**Figure S3A**). *zip* DoA measurements in wt and RNAi  
148 cells in each of the three conditions provided a quantitative evaluation of the changes observed in  
149 smFISH experiments (**Figure S3B**), with a significant decrease in KD/wt DoA in double (*egl+Khc*)  
150 RNAi cells (KD/wt DoA = 1.61) compared to *Khc* RNAi cells (KD/wt DoA = 2.49) (**Figure S3C**).  
151 Therefore, despite being dispensable in basal RNA localization under normal conditions, the  
152 dynein/BicD/Egl complex is responsible for the apical mislocalization of a basal RNA (and possibly  
153 more) when kinesin-1 activity is lacking.

154

### 155 **Two different dynein-dependent mechanisms control apical RNA localization**

156 As mentioned previously, several reports have identified the dynein/BicD/Egl machinery as  
157 responsible for the apical localization of a subset of RNAs in the FE, such as *crumbs* (*crb*) (Li et al.,  
158 2008; Bhagavatula & Knust, 2021). To test in an unbiased way the degree of involvement of the  
159 dynein/BicD/Egl machinery in the localization of apical RNAs in the FE, we generated FC mutant  
160 clones in which either cytoplasmic dynein (*Dhc64C*, hereafter called *Dhc*) or Egalitarian (*egl*) were  
161 knocked-down by RNAi (**Figure S4A**). We then analyzed the localization pattern of 5 validated apical  
162 RNAs (*crb*, *msps*, *qtc*, *CG33129*, *BicD*, with *crb* RNA as a positive control) by smFISH, along with the  
163 quantification of RNA localization by measuring the KD/wt DoA. The localization of all apical RNAs  
164 analyzed was completely abolished when *Dhc* was knocked down by RNAi, with the RNAs becoming  
165 ubiquitously distributed (**Figure 3A,C**). *egl* RNAi caused all apical RNAs to lose their apical  
166 localization, with the surprising exception of *BicD* (**Figure 3B,C**; see below). In contrast, basal RNAs  
167 largely maintained their basal localization pattern upon either *Dhc* RNAi or *egl* RNAi treatment (**Figure**  
168 **S4B,C** and **Figure 3C**). Basal RNA localization was only mildly affected in a subset of *Dhc* RNAi cells,

169 likely as a consequence of the emergence of polarity defects in cells lacking Dhc (Horne-Badovinac &  
170 Bilder, 2008; Ronchi et al, 2021) (see Figure 3A and Figure S3B). The maintenance of *BicD* RNA  
171 localization in *egl* RNAi cells was not due to a low efficiency of the RNAi, since both *egl* RNA and Egl  
172 protein were significantly reduced in *egl* KD cells (**Figure S4D,E**). Moreover, in egg chambers entirely  
173 lacking Egl throughout the FE (*egl*<sup>NULL</sup>FC, see Materials and Methods), *BicD* RNA was still apically  
174 localized, whereas localization of CG33129 RNA, previously found to be Egl-dependent (see Figure  
175 3B), was disrupted (**Figure S4F**). Altogether, these results show that the dynein/BicD/Egl complex is  
176 largely responsible for apical RNA localization, but a different dynein-dependent mechanism underlies  
177 the apical localization of *BicD* RNA. Considering that the Egl-independent targeting of *BicD* RNA  
178 represents a novel mechanism of apical RNA localization, we sought to gain more insight into the  
179 mechanisms regulating its RNA transport.

180

### 181 ***BicD* RNA localization requires an intact translation machinery**

182 Localization of *BICD2/BicD* RNA at centrosomes in cultured cells is translation-dependent (Safieddine  
183 et al., 2021). To test whether *BicD* RNA localization in the FE involves the same mechanism, we  
184 treated egg chambers *ex vivo* with the translation inhibitors puromycin (Puro) and cycloheximide  
185 (CHX) and analyzed the distribution of *BicD* RNA under these two conditions compared to control  
186 ovaries incubated in Schneider's medium only (**Figure 4A**). To assess tissue integrity, in parallel we  
187 visualized *osk* RNA, whose localization during the middle stages of oogenesis should not be affected  
188 by translation inhibitors. Whereas the localization pattern of *BicD* RNA in CHX-treated egg chambers  
189 was similar to controls (**Figure 4B,D**), Puro treatment clearly impaired *BicD* RNA localization in the FE  
190 (**Figure 4C**). The distribution of *BicD* signal intensity along the A-B axis of mid-stage follicle cells  
191 shows that *BicD* enrichment at the apical cortex of the FE was severely reduced upon Puro treatment  
192 (**Figure 4E**). As a proxy for the degree of signal mislocalization, we calculated the value  
193 corresponding to 50% of the cumulative area under the curve (a.u.c.) in Puro- or CHX-treated egg  
194 chambers and compared it with untreated controls. The results of this analysis show that the *BicD*  
195 RNA signal shifted significantly towards the basal domain in Puro-treated egg chambers, whereas  
196 CHX had no effect on *BicD* RNA localization (**Figure 4F**). The fact that freezing elongating ribosomes  
197 (CHX condition) does not affect *BicD* RNA localization, whereas blocking translation by releasing the

198 nascent peptide (Puro condition) does, indicates that an intact translation machinery and the presence  
199 of a nascent peptide may be required for *BicD* RNA localization in FCs.

200

### 201 ***BicD* RNA is co-translationally localized**

202 To understand whether the localization of *BicD* depends on translation of its own RNA (in *cis*) or of  
203 other factors (in *trans*), we designed a series of transgenic constructs consisting of a BicD-GFP  
204 cassette inserted downstream of an 18-bp linker in which we could introduce the desired frameshift  
205 mutations without disrupting any unknown RNA localization element in the BicD CDS (**Figure S5A**).  
206 Each of these transgenes was expressed in FC clones in a *BicD* wild-type background and the  
207 transgenic *BicD-GFP* RNA was specifically detected by smFISH using antisense GFP probes. *GFP*  
208 RNA carrying the same 3' untranslated region (UTR) as BicD-GFP constructs failed to localize when  
209 expressed in the germline or in the FE (**Figure S5B**), showing that this sequence alone is not  
210 sufficient to drive RNA localization. In contrast, the in-frame <sup>0</sup>*BicD-GFP* RNA showed a strong apical  
211 localization in FCs (**Figure 4G-I**), similarly to the endogenous *BicD* RNA (see Figure S6A). Moreover,  
212 the expression of full-length BicD-GFP was validated by the presence of GFP fluorescence in CD8-  
213 mCherry<sup>+</sup> cells expressing the transgene (**Figure 4G**). Disruption of the BicD-GFP reading frame by  
214 either +1 or -1 frameshift, verified by the absence of GFP signal in CD8-mCherry<sup>+</sup> cells, was sufficient  
215 to impair apical RNA localization (**Figure 4G-I**). Consistent with the puromycin-induced impairment of  
216 RNA localization in the FE, these results show that *BicD* RNA is co-translationally localized at the  
217 apical cortex.

218

### 219 ***BicD* and *Dhc* RNAs decorate dynein particles at the apical cortex**

220 As in *BicD* the first peptide emerging from the ribosome is the dynein-binding domain (Hoogenraad et  
221 al., 2003), the co-translational localization of *BicD* RNA might depend on association of nascent *BicD*  
222 protein with dynein. To have an indication whether this might be the case, we imaged *BicD* RNA by  
223 smFISH in ovaries expressing endogenously tagged *Dhc-GFP* (Gaspar et al., 2021). Although the  
224 *Dhc-GFP* signal was diffuse in the ovary, distinct *Dhc-GFP* foci were detected at the apical cortex of  
225 columnar FCs (**Figure 4J**) and elsewhere in the germline (see below). These foci also contain *Dhc*  
226 RNA, indicating that these might be sites of *Dhc* RNA translation. *BicD* RNA showed a partial co-

227 localization with Dhc-GFP/*Dhc* RNA foci, consistent with the hypothesis of its co-translational  
228 association with newly synthesized Dhc protein at the apical cortex.

229

### 230 **The first step of *BicD* RNA localization in the early cyst is translation-independent**

231 In the germline, BicD has an instructive role in oocyte specification (Wharton & Struhl, 1989; Suter &  
232 Steward, 1991; Mach & Lehmann, 1997). Importantly, *BicD* RNA localization reflects MT minus end  
233 enrichment (Steinhauer & Kalderon, 2006; Clark et al., 1997) in both the germline and FE (**Figure**  
234 **S6A**). We noticed that, as in the FE, *BicD* RNA localization to the posterior of the oocyte (stages 9-10)  
235 was impaired in Puro-treated ovaries, whereas CHX had no effect (**Figure 4C,D**). The same effect  
236 was visible in younger egg chambers, starting when BicD becomes posteriorly localized in the small  
237 oocyte at stages 4-5 (**Figure S6B**). In contrast, neither Puro nor CHX treatment abolished *BicD* nurse  
238 cell-to-oocyte transport in early egg chambers, with *BicD* enrichment in the small oocyte being close to  
239 wild-type levels (**Figure S6B**). Consistent with this, germline-driven *Frameshift* BicD-GFP RNA  
240 underwent nurse cell-to-oocyte transport and displayed a clear oocyte enrichment during early stages,  
241 similarly to endogenous *BicD* (**Figure S6C**). However, within the oocyte, *Frameshift* RNA was  
242 ubiquitously distributed at these stages, and failed to localize at the posterior cortex of the small  
243 oocyte. These results indicate that the process of *BicD* RNA transport into the oocyte does not involve  
244 active translation; on the other hand, *BicD* RNA localization within the oocyte is likely governed by the  
245 same co-translational mechanism that operates in the FE. In support of this hypothesis, we found that  
246 *BicD* RNA decorates Dhc/*Dhc* RNA foci in both the FE and the oocyte, but not in the nurse cells  
247 (**Figure S6D**). Taken together, these results indicate that the mid-oogenesis oocyte and the columnar  
248 FCs share a similar co-translational mechanism for *BicD* RNA localization. In contrast, *BicD* RNA  
249 nurse cell-to-oocyte localization appears to be mediated by a translation-independent mechanism that  
250 does not involve the association with Dhc/*Dhc* RNA particles.

251

### 252 **A subset of dynein-activating adaptor RNAs are also co-translationally localized in the FE**

253 BicD belongs to the class of dynein-activating adaptors, linking cargoes to the dynein motor complex  
254 (Olenick & Holzbaur, 2019). We found that the RNA encoding all *Drosophila* orthologs of the currently  
255 known or putative dynein activating adaptors (hereafter collectively called “adaptor RNAs”), namely  
256 *hook* (HOOK2-3), *Bsg25D* (NIN/NINL), *Nuf* (RAB11FIP3), and *Milton* (TRAK1-2), were significantly

257 enriched apically in our list of localizing transcripts (**Table S1**), with the exception of *Spindly* (SPDL1)  
258 which was below the detection threshold. By hypothesizing that the same dynein-dependent co-  
259 translational process that drives *BicD* RNA localization would also be responsible for the apical  
260 localization of adaptor RNAs, we tested whether the localization of adaptor RNAs was affected by  
261 either *Dhc* or *egl* RNAi. With the exception of *Nuf* and *Milton*, whose localization was disrupted by  
262 either treatment (data not shown), the apical localization of *Bsg25D* and *hook* (**Figure 5A**) was  
263 significantly disrupted in *Dhc* RNAi cells (**Figure 5B,D**), but not in *egl* RNAi cells (**Figure 5C,D**).  
264 Moreover, the apical localization of both adaptor RNAs showed sensitivity to Puro but not CHX  
265 (**Figure 5E,F**), although the change measured in *Bsg25D* signal distribution along the A-B axis in the  
266 FE was not significantly different from untreated control (**Figure 5G**). However, *Bsg25D* is expressed  
267 at low levels in the FE, hindering a robust quantitative image analysis. To further investigate whether  
268 *hook* and *Bsg25D* use the same localization mechanism as *BicD*, we analyzed their spatial  
269 relationship with Dhc-GFP/*Dhc* RNA particles. As for *BicD*, both *Bsg25D* (**Figure 5H**) and *hook*  
270 (**Figure 5I**) were shown to partially co-localize with, thus decorate Dhc-GFP foci, which also contain  
271 *Dhc* RNA. Overall, these results suggest that the RNAs encoding the dynein activating adaptors *BicD*,  
272 *hook*, and *Bsg25D*, represent a subgroup of apical RNAs that share the same co-translational, dynein-  
273 dependent mechanism that ensures their localization at cortical dynein foci also containing *Dhc* RNA.  
274



275 **DISCUSSION**

276 Only few examples of localizing RNAs in the FE have been described to date, with little mechanistic  
277 insight (Jambor et al., 2015; Li et al., 2008; Horne-Badovinac & Bilder, 2008; Vazquez-Pianzola et al.,  
278 2017; Schotman et al., 2008; Serano & Rubin, 2003). To explore the extent of RNA localization in a  
279 somatic tissue *in vivo* and gain insight into the mechanisms underlying the phenomenon, we have  
280 used laser-capture microdissection of apical and basal subcellular fragments of columnar follicle cells  
281 coupled with RNA-seq to identify localizing RNAs in this tissue. This allowed us to investigate in detail  
282 the landscape of mechanisms that mediate both apical and basal RNA localization in the FE (**Figure**  
283 **6A**). In our study, we found that basal RNA localization is mechanistically analogous to posterior RNA  
284 localization in the oocyte (represented by *osk*), reflecting MT plus end enrichment (Clark et al., 1997).  
285 *Khc*, *aTm1*, and the EJC appear to be core components of a general “basal” RNA localization  
286 machinery. These results are in line with previous findings on *osk* RNA indicating that *Khc/aTm1* bind  
287 to the 3'UTR (Gaspar et al., 2017) and the EJC activates kinesin-1 transport through association with  
288 the coding sequence (Ghosh et al., 2012).

289  
290 Interestingly, when either component of the kinesin-1 transport complex was lacking, basal RNAs  
291 were mislocalized to the apical domain in a dynein-dependent process. Therefore, dynein-mediated  
292 apical localization represents a “default” mechanism that must be overcome by kinesin-1 to drive basal  
293 RNA localization. Two possible scenarios could explain dynein-mediated apical mislocalization upon  
294 kinesin inhibition. Dynein and kinesin-1 could be engaged in a tug of war, pulling the RNAs in  
295 opposing directions, a phenomenon observed in the transport of vesicles and lipid droplets (Hancock,  
296 2014). Alternatively, the dynein complex could be kept in an inhibited state and activated upon  
297 disruption of kinesin-1 and its regulators. If the tug-of-war scenario were correct, we would have  
298 expected a change in *zip* RNA localization in all RNAi conditions including *egl* RNAi alone, namely a  
299 shift to a more basal localization due to the enhanced *Khc*-dependent motility. However, since we did  
300 not see a significant change in *zip* localization when only *Egl* was knocked down, the tug-of-war  
301 hypothesis appears to be less likely than the inhibition hypothesis. In addition, this phenomenon  
302 recalls *osk* RNA mislocalization to the oocyte anterior upon disruption of kinesin-1, *aTm1* or EJC  
303 components (Brendza et al., 2000; Cha et al., 2002; Erdélyi et al., 1995; Hachet & Ephrussi, 2001;  
304 Mohr et al., 2001; Newmark & Boswell, 1994; Palacios et al., 2004; Zimyanin et al., 2008) which was

305 hypothesized to occur due to a failure to inactivate dynein-mediated RNA transport (Zimyanin et al.,  
306 2008).

307

308 Apical RNA localization, on the other hand, can be divided into two mechanistically distinct categories,  
309 both based on dynein-mediated transport. The first category includes those RNAs that are transported  
310 apically by the dynein/BicD/Egl machinery, a well characterized RNA transport complex that directs  
311 RNAs towards MT minus ends in a variety of tissues (Bullock & Ish-Horowicz, 2001). Our data suggest  
312 that the majority of apically localizing RNAs may belong to this class, as the localization of most of our  
313 randomly chosen apical RNAs was affected in both *Dhc* RNAi and *egl* RNAi conditions. This  
314 hypothesis is consistent with previous studies that identified several apical RNAs as BicD/Egl cargoes,  
315 in a variety of *Drosophila* tissues (Li et al., 2008; Bhagavatula & Knust, 2021; Karlin-McGinness et al.,  
316 1996; Jambor et al., 2014; Vazquez-Pianzola et al., 2017; Van De Bor et al., 2011).

317

318 The second category of dynein-dependent apical RNAs does not involve Egalitarian activity for their  
319 localization. This includes a subgroup of dynein-activating adaptors, namely *BicD*, *hook*, and *Bsg25D*  
320 (*BICD2*, *HOOK1-3*, and *NIN/NINL* in mammals). Common features of their apical RNA localization  
321 include sensitivity to puromycin and partial co-localization with cortical dynein foci containing also *Dhc*  
322 RNA. Puromycin causes the disassembly of the translational machinery and the release of the N-  
323 terminal peptides emerging from ribosomes. As the N-terminal portion of these adaptors was shown to  
324 bind dynein or dynactin subunits (Hoogenraad et al., 2003; Chowdhury et al., 2015; Urnavicius et al.,  
325 2015; Schroeder & Vale, 2016; Redwine et al., 2017; Lee et al., 2020), we propose that the apical  
326 localization of *BicD*, *hook*, and *Bsg25D* depends on the co-translational association between dynein  
327 components and nascent adaptors at cortical dynein foci (**Figure 6B**). This process might also be  
328 conserved in mammals, since the localization of both *BICD2* and *NIN* RNA was shown to be  
329 puromycin-sensitive (Safieddine et al., 2021). Previous studies have shown that dynein/dynactin  
330 particles have a low affinity to MTs and predominantly exhibit non-processive movements (Torisawa et  
331 al., 2014; Trokter et al., 2012). *BICD2*, *HOOK3* and *NIN/NINL* were shown to promote the formation of  
332 highly processive dynein/dynactin complexes (McKenney et al., 2014; Schalager et al., 2014; Redwine  
333 et al., 2017). Therefore, it is possible that co-translational assembly of components of the dynein-  
334 adaptor complexes is necessary to overcome dynein auto-inhibition (Torisawa et al., 2014; Zhang et

335 al., 2017). *BicD*, *hook*, and *Bsg25D* may co-translationally associate with dynein soon after nuclear  
336 export of the RNA, promoting its apical transport in a manner similar to what has been proposed for  
337 *PCNT* RNA targeting at centrosomes (Sepulveda et al., 2018). Alternatively, since dynein can also  
338 function as a MT-tethered static anchor in mid-oogenesis oocytes and follicle cells (Delanoue & Davis,  
339 2005; Delanoue et al., 2007), the interaction between dynein and nascent adaptor proteins could  
340 occur after the RNA has reached the cell cortex by dynein-mediated transport. Indeed, puromycin  
341 treatment did not completely abolish the apical enrichment of adaptor RNAs, despite causing a  
342 marked decrease in their signal close to the apical cortex, where they decorate dynein cortical foci.  
343  
344 *In vitro* studies have shown that full-length BicD/BICD2 adopts an autoinhibitory conformation resulting  
345 from CC1/2 folding onto the CTD-containing CC3 (Hoogenraad et al., 2001; Dienstbier et al., 2009;  
346 Stuurman et al., 1999). Although the leading hypothesis in the field is that cargo binding to the CTD is  
347 responsible for the alleviation of auto-inhibition by freeing up the N-terminal dynein-binding domain  
348 (Dienstbier et al., 2009; Hoogenraad et al., 2001, 2003; Matanis et al., 2002), it is possible that *in vivo*  
349 both nascent BicD interaction with dynein and cargo binding to the CTD might cooperate in preventing  
350 BicD intramolecular inhibition in the cellular environment. Strikingly, whereas the mechanism  
351 underlying oocyte localization of *BicD* RNA during mid-oogenesis resembles that observed in follicle  
352 cells, the nurse cell-to-oocyte transport of *BicD* RNA appears to be governed by a different,  
353 translation-independent mechanism that may not involve interaction with *Dhc/Dhc* RNA particles,  
354 consistent with a previous study indicating that *BicD* RNA is translationally inhibited by Me31B in the  
355 nurse cells (Nakamura et al., 2001). In contrast to early egg chambers in which the MT network  
356 emanates from a posteriorly-positioned microtubule organizing center in the oocyte, mid-stage oocytes  
357 and columnar follicle cells are both characterized by non-centrosomal MTs tethered to the cell cortex  
358 (Tillery et al., 2018). Therefore, the establishment of ncMTs could be at the basis of the mechanistic  
359 switch from translation-independent to co-translational *BicD* RNA localization in these compartments.  
360 Strikingly, a recent report has shown that *NIN* RNA (the mammalian ortholog of *Bsg25D*) localizes at  
361 ncMTs and its expression is essential for apico-basal MT formation and columnar epithelial shape  
362 (Goldspink et al., 2017). Therefore, it is possible that the co-translational transport of adaptor RNAs  
363 may be important for correct ncMT nucleation at the apical cortex of the follicular epithelium.

## 364 **MATERIALS AND METHODS**

### 365 **LCM sample preparation**

366 *w1118* virgin females were kept with males for 24 h at 25°C on yeast-supplemented cornmeal food.  
367 Ovaries were dissected in PBS, transferred to a cryomold and snap-frozen in cold 2-Methylbutane  
368 after removal of excess PBS. Frozen ovaries were immediately covered with OCT cryoembedding  
369 compound (Sakura) and snap-frozen again. Before cryostat sectioning, each block was equilibrated at  
370 -20°C for 1 h. 10 µm cryosections of OCT-embedded ovaries were carefully placed on a  
371 MembraneSlide NF 1.0 PEN (Zeiss), briefly thawed at RT and immediately fixed in 75% RNase-free  
372 (RF) ethanol for 30 s. Excess OCT was removed with ddH<sub>2</sub>O RF, and slides were stained in 100 µl  
373 Histogene staining solution (Arcturus) according to the manufacturer's instructions. Finally, sections  
374 were dehydrated in increasing ethanol concentrations (75%, 95%, 100%), and briefly air-dried before  
375 LCM.

376

### 377 **LCM and RNA-seq**

378 LCM was performed with a Zeiss PALM MicroBeam and visualized under a 63X objective. Sectioned  
379 mid-oogenesis egg chambers were staged according to morphological criteria. Once stage 9-10 egg  
380 chambers had been identified, either the apical half ("apical fragment") or the basal half ("basal  
381 fragment") of 5-10 contiguous columnar follicle cells was microdissected and collected into the cap of  
382 an AdhesiveCap tube (Zeiss). 10 fragments of either apical or basal sample type from different egg  
383 chambers were pooled for each replicate, with a total microdissected area of ~3000-4000  
384 µm<sup>2</sup>/replicate. LCM samples were processed according to Chen et al. (2017) to produce high-quality  
385 Illumina sequencing libraries. Samples were multiplexed and simultaneously sequenced in a single  
386 lane using the NextSeq500 system according to the manufacturer's instructions.

387

### 388 **RNA-seq analysis**

389 Pre-processing of demultiplexed raw reads was performed on EMBL's instance of Galaxy platform.  
390 Read quality was checked after each processing step with FastQC (Andrews, 2010). Low-quality  
391 bases and adapter sequences were trimmed from raw read with Trimmomatic (Bolger et al., 2014).  
392 rRNA-filtered reads (SortMeRNA, Kopylova et al., 2012) were mapped against *D. melanogaster*  
393 Release 6 (dm6) reference genome with STAR (Dobin et al., 2013). To control for RNA degradation

394 that might have occurred during LCM, the normalized transcript coverage of the uniquely mapping  
395 reads was calculated with CollectRNAseqMetrics (part of Picard tools,  
396 <http://broadinstitute.github.io/picard/>). Uniquely mapped reads were counted with featureCounts (Liao  
397 et al., 2014) and normalized with DESeq2 (Love et al., 2014). Differential gene expression analysis  
398 was performed with DESeq2 by comparing the mean read counts of the Apical (4 replicates, A1-A4)  
399 and Basal (4 replicates, B1-B4) samples. Replicates A5 and B5 were excluded from further analysis  
400 due to their high degree of dissimilarity with replicates of the same sample type as shown by PCA and  
401 Euclidean distance analysis, probably due to a high degree of contamination from neighboring tissues.  
402 Statistical significance was set to an FDR-adjusted p value < 0.1 (Benjamini-Hochberg correction for  
403 multiple testing). The R package ComplexHeatmap (Gu et al., 2016) was used to generate the  
404 heatmap in Figure 2B.

405

#### 406 **Identification of contaminant reads**

407 Identification of contaminant RNAs was performed with R Studio. Among the RNAs that were  
408 significantly enriched in either the apical ( $\log_2FC > 0$ ) or the basal ( $\log_2FC < 0$ ) domain, were  
409 considered “contaminants” those RNAs displaying high absolute  $\log_2$ FoldChange ( $|\log_2FC|$ ),  
410 indicating that they were probably originating from neighboring tissues. A threshold of  $\log_2FC > 3$  and  
411  $\log_2FC < -3$  was arbitrarily set to identify putative apical and basal contaminants, respectively. The  
412 functional annotation of each contaminant candidate was retrieved on FlyBase (release FB2020\_6)  
413 (Larkin et al., 2021) and their read distribution among apical and basal replicates analyzed through  
414 Integrative Genomics Viewer (IGV) (Robinson et al., 2011).

415

#### 416 **Fly stocks and genetics**

417 All fly stocks were maintained at 18°C on standard fly food. For crosses, virgin females were mated  
418 with *w1118* males at 25°C on cornmeal food supplemented with yeast. Female offspring of the desired  
419 genotype were incubated with *w1118* males on a yeast-supplemented medium for 24h at 25°C to  
420 stimulate the development of vitellogenic stage egg-chambers before ovary dissection.

421 The following stocks were obtained from the Bloomington Drosophila Stock Center (BDSC): *w1118*  
422 (wild-type; #3605), *DhcRNAi* (#36698), *eglRNAi* (#28969), *KhcRNAi* (#35409), *UAS-NLS-mCherry*  
423 (#38425), *osk-Gal4* (#44242), *VK33* (#9750). Other stocks used were: *HsFLP*; *arm>f+>Gal4*;

424 *UAS-CD8-mCherry* and *tj-Gal4/CyO* (gifts of Juan Manuel Gomez Elliff), *Tm1<sup>eg1</sup>/TM3Sb,Ser* and  
425 *Tm1<sup>eg9</sup>/TM3Sb,Ser* (Erdélyi et al., 1995), *Dhc64C-GFP* (Gáspár et al., 2021), *vasa-Gal4/TM3Sb* (gift  
426 of Jean Rene Huynh), *UAS-ΔC-Pym-GFP* (Ghosh et al., 2014), *UAS-Egl* (Bullock et al., 2006),  
427 *egl<sup>WU50</sup>/SM1* and *egl<sup>PR29</sup>/SM6A* (Mach & Lehmann, 1997). Transgenic flies carrying *UAS-GFP*, *UAS-*  
428 *<sup>0</sup>BicD-GFP*, *UAS-<sup>(+1)</sup>BicD-GFP*, and *UAS-<sup>(-1)</sup>BicD-GFP* were generated in this study by phiC31  
429 integrase-mediated recombination using the VK33 line, which carries an attP site on the third  
430 chromosome.

431 For the generation of *egl<sup>NULL</sup>FC* flies, *egl<sup>WU50</sup>/CyO*; *osk-Gal4/TM3Ser* were crossed with *egl<sup>PR29</sup>/CyO*;  
432 *UAS-Egl/TM3Ser* to generate *egl<sup>WU50</sup>/egl<sup>PR29</sup>*; *osk-Gal4/UAS-Egl*, expressing Egl only in the germline  
433 lineage to rescue the formation of rudimentary ovaries. *tj-Gal4* and *vasa-Gal4* drivers were used to  
434 express UAS-containing transgenes in the whole follicular epithelium and in the germline, respectively.  
435 To generate flies for FC mutant clone induction, male flies carrying a UAS-containing transgene were  
436 crossed with *hsFlp*; *arm>f+>Gal4*; *UAS-CD8-mCherry* virgins, and F1 females were subjected to heat-  
437 shock as described below.

438 To generate flies for induction of FC mutant clones in the experiment illustrated in Figure S3, *HsFLP*;  
439 *arm>f+>Gal4/CyO*; *KhcRNAi/TM6B,Tb* flies were crossed with +; *UAS-NLS-mCherry/CyO*;  
440 *eglRNAi/TM3Ser*. F1 Female flies the desired genotypes [*eglRNAi/TM6B,Tb* for the *egl* RNAi  
441 condition; *KhcRNAi/TM3Ser* for the *Khc* RNAi condition; *eglRNAi/KhcRNAi* for the (*egl+Khc*) RNAi  
442 condition] were collected and subjected to heat-shock as described below.

443

#### 444 **Generation of follicle cell clones**

445 The UAS-Gal4 “flip-out” system was used to generate marked mutant clones in a wild-type  
446 background (Struhl & Basler, 1983; Pignoni & Zipurski, 1997). Freshly eclosed females resulting from  
447 each cross were collected and mated with *w1118* males for 24 h at 25°C on food supplemented with  
448 yeast. Flies were heat-shocked for 1h in a water bath heated at 37°C. According to Gonzales-Reyes &  
449 St Johnston (1998), heat-shocked females were kept for 39 h at 25°C with males on yeast before  
450 dissection, thus allowing follicle cells that induced the expression of the transgene at stage ~ 5 to  
451 develop into stage 10 follicle cells.

452

#### 453 **Ex vivo pharmacological treatment**

454 Young *w1118* female flies were incubated with males for 24 h at 25°C on fly food supplemented with  
455 yeast. Ovaries were dissected in PBS and immediately incubated in Schneider's medium (Gibco)  
456 supplemented with 15% FBS (Gibco), 0.6X penicillin/streptomycin (Invitrogen), 200 µg/ml insulin  
457 (Sigma). For translation inhibitor treatment, either 200 µg/ml puromycin (Gibco) or 200 µg/ml  
458 cycloheximide (Sigma) or no compound (control) was added fresh to the medium and ovaries were  
459 incubated for 30 min at RT before fixation.

460

#### 461 **Generation of BicD-GFP constructs and transgenic fly lines**

462 AttB-pUASp-BicD-GFP-K10 or AttB-pUASp-GFP-K10 plasmids carrying a *w+* cassette, a TLS-  
463 deficient version of the K10 3'UTR, and attB sites for phiC31 integrase-mediated recombination into  
464 the VK33 line were generated as follows.

465 To generate plasmid vectors carrying the BicD-GFP gene cassettes (<sup>0</sup>*BicD-GFP*, <sup>(-1)</sup>*BicD-GFP*,  
466 <sup>(+1)</sup>*BicD-GFP*, *GFP*), BicD and GFP CDS were amplified by PCR and the two fragments were  
467 combined into AttB-pUASp-K10 vector by InFusion cloning (Clontech) according to the manufacturer's  
468 instructions. pBS-BicD (BicD-RA, FlyBase ID: FBpp0080555) plasmid (a kind gift from Jean-Baptiste  
469 Coutelis) was used as template to generate BicD CDS PCR amplicons. The Fw primer used to amplify  
470 BicD CDS was designed in order to include, in addition to a 20 nt-homology with AttB-pUASp-K10  
471 vector, the *Drosophila* Kozak sequence (Cavener, 1987) in frame with a linker sequence where  
472 frameshift mutations could be generated, and a region annealing to nt 4-29 of BicD CDS. To generate  
473 <sup>0</sup>*BicD-GFP* construct, the 18-bp linker containing the ATG (5'- ATGATCCTAGGCGCGCGG- 3') was  
474 inserted in frame with nt 4-2346 of BicD-RA. To generate <sup>(+1)</sup>*BicD-GFP* construct, a C was inserted at  
475 position 4 in the N-terminal 18-bp linker (5'- ATGCATCCTAGGCGCGCGG- 3'). To generate <sup>(-1)</sup>*BicD-*  
476 *GFP* construct, a G was deleted at position 10 in the N-terminal 18-bp linker (5'-  
477 ATGATCCTA\_ GCGCGCGG- 3'). <sup>0</sup>*BicD-GFP*, <sup>(-1)</sup>*BicD-GFP*, and <sup>(+1)</sup>*BicD-GFP* full insert sequences  
478 with the respective predicted translated ORF are listed in **File S2**.

479 To generate UAS-GFP construct, GFP ORF was amplified with a Fw primer containing KpnI restriction  
480 site upstream of GFP ATG and with a Rev primer containing NotI restriction site and the stop codon.  
481 The amplified fragment was gel purified, digested with KpnI and NotI and ligated into a AttB-pUASp-  
482 K10 vector digested with the same enzymes.



483 Each AttB-containing plasmid was purified and sequenced before injection into VK33 embryos  
484 carrying an attP site on the 3<sup>rd</sup> chromosome. Injected flies were crossed with *If/CyO*; *Sb/TM3Ser*  
485 individuals and transgenic F1 flies were identified by appearance of red eye color.

486

#### 487 **Immunostaining**

488 5-10 pairs of ovaries were dissected in PBS and immediately fixed in 2% PFA in PBSTX(0.1%) (PBS  
489 + 0.1% Triton-X100) on a Nutator for 20 min at RT, followed by two washes of 15 min each with  
490 PBSTX(0.1%) shaking at RT. Ovaries were then blocked in 1X casein/PBSTX(0.1%) (stock: 10X  
491 casein blocking buffer, Sigma) for 30 min and incubated with rabbit anti-Egl primary antibody (kind gift  
492 from R. Lehmann, Mach & Lehmann, 1997) diluted in blocking buffer o/n at 4°C. Alexa fluor 647 goat  
493 anti Rabbit (Jackson Immuno Research) secondary antibody was added in blocking buffer for 2 h at  
494 RT. Samples were washed 3x 10 min with 1X casein/PBSTX(0.1%), 1x 10 min with PBSTX(0.1%) +  
495 1:15,000 DAPI and kept o/n in 100 µl of 80% TDE/PBS before mounting on microscope slides.

496

#### 497 **Single molecule *in situ* Fluorescence Hybridization (smFISH)**

498 smFISH antisense oligonucleotides (listed in **Table S2**) were designed and labelled with dye-  
499 conjugated ddUTPs according to the protocol described by Gáspár et al. (2017) to generate  
500 oligonucleotides labelled at their 3' and with ATTO-633-NHS ester (ATTO-TEC). When dual-color  
501 smFISH experiments were performed, each probe set was labelled with either ATTO-633 or ATTO-  
502 565. The degree of labelling (DOL, % of labelled oligos) and concentration of the labelled probe sets  
503 was measured according to the published algorithm.

504 Dissected ovaries were immediately fixed in 2% PFA/PBSTX(0.1%) gently shaking for 20 min at RT.  
505 In case of *ex vivo* ovary incubation, dissected ovaries were incubated in Schneider's medium  
506 supplemented with the respective pharmacological treatment before proceeding with fixation, as  
507 described above. Fixed ovaries were rinsed and washed twice with PBSTX(0.1%) for 10 min before  
508 dehydrating them by replacing PBSTX(0.1%) with increasing concentrations of ethanol/PBSTX(0.1%).  
509 Fixed and dehydrated ovaries were kept in 100% ethanol at -20°C for up to 10 days until the day of  
510 the experiment.

511 An optimized version of the smFISH protocol described in Hampoelz et al. (2019) was followed with  
512 minor modifications. All steps were performed at RT unless specified otherwise. Dehydrated ovaries



513 were first rinsed with PBSTX(0.1%), followed by 2x15 min washes with PBSTX(0.1%), and incubated  
514 in Pre-hybridization Buffer (2x SSC, 10% deionized formamide, 0.1% Tween-20) gently shaking for 30  
515 min. The Pre-hybridization Buffer was replaced with 250 µl of Hybridization Buffer (2x SSC, 10%  
516 deionized formamide, 0.1% Tween-20, 2 mM vanadyl ribonucleoside complex (New England Biolabs),  
517 100 µg/mL salmon sperm DNA (Invitrogen), 10% dextran sulfate, 20 µg/mL BSA) pre-warmed at 37°C  
518 in which smFISH probes were added to a final concentration of 1 nM/probe. Ovaries were kept  
519 hybridizing in the dark for 16-17 h on a heat block set at 37°C shaking at 1000 rpm. To remove the  
520 excess probes, ovaries were washed 3x 10 min at 37°C with Washing Buffer (2x SSC, 10%  
521 deionized formamide, 0.1% Tween-20). 1:15,000 DAPI was added to the second wash. Finally,  
522 samples were rinsed 4x in PBST(0.1%) (PBS + 0.1% Tween20) and kept in 100 µl of 80%  
523 TDE/PBS for at least 1 h before mounting on microscope slides.

524 Z-stacks of images were acquired on a Leica TCS SP8 confocal microscope with 405nm, 488 nm, 552  
525 nm and 640 nm fixed excitation laser lines using a 63X 1.3 NA glycerol immersion objective. A suitable  
526 range for spectral detection was carefully chosen for each channel to avoid cross-talk of fluorescence  
527 emission. Images were automatically restored by deconvolution with the Lightning module.

528

### 529 **Image analysis and statistical testing**

530 To quantify smFISH fluorescence of localizing RNAs, average Z-projections of deconvolved confocal  
531 image stacks were analyzed with Fiji (Schindelin et al., 2012). In mosaic FE, for each wild-type (wt,  
532 unmarked) and mutant (mCherry-marked) group of cells within the same Z-stack, a region of interest  
533 (ROI) was drawn encompassing the apical and the basal cytoplasm of 5-10 adjacent follicle cells (with  
534 the exclusion of nuclei); in addition, a ROI was drawn in an area of the image where no signal was  
535 present (background, bg). The mean fluorescence intensity (m.f.i.) was measured for each ROI.  
536 The degree of apicality (DoA) of a given RNA in each cell type ( $t$ ) (wild-type or mutant) and each  
537 experimental condition  $c$ , was measured as follows:

$$538 \quad DoA_{t,c} = \left( \frac{Apical\ m.f.i._t - bg\ m.f.i.}{Basal\ m.f.i._t - bg\ m.f.i.} \right)_c$$

539 To quantitatively analyze changes in RNA localization in each experimental condition  $c$ , the DoA  
540 measured in mutant (KD) cells was divided by the DoA measured in neighboring wild-type (wt) cells  
541 within the same Z-stack:

542 
$$KD/wt DoA_c = \left( \frac{DoA_{KD}}{DoA_{wt}} \right)_c$$

543 Only in  $Tm1^{NULL}$  condition, due to the impossibility to obtain a mosaic tissue, the DoA of a given RNA  
544 in each cell type ( $t$ ) (wild-type or  $Tm1^{NULL}$ ), was measured as follows:

545 
$$DoA_t = \left( \frac{Apical\ m.f.i - bg\ m.f.i}{Basal\ m.f.i - bg\ m.f.i} \right)_t$$

546 To calculate the change in DoA, the DoA measured in single  $Tm1^{NULL}$  egg chambers was divided by  
547 the average DoA measured in  $n$  wild-type egg chambers (wt):

548 
$$Tm1^{NULL}/wt DoA = \frac{DoA_{Tm1^{NULL}}}{\frac{1}{n} \sum DoA_{wt}}$$

549 In Figure 2D, Figure 3C, and Figure 5D, KD/wt DoA values of each RNA and experimental condition  
550 was measured across at least 3 different Z-projections, and the average value obtained was  
551 compared to the null hypothesis  $H_0$ : KD/wt DoA=1, corresponding to no change in RNA localization  
552 bias following KD treatment [DoA(KD)=DoA(wt)]. One-sample Student's  $t$ -test was used to compare  
553 means to a reference value of  $\mu = 1$  in each experimental condition.

554 In Figure S3B, independent Student's  $t$ -test was used to compare mean DoA(wt) and DoA(RNAi)  
555 values in each condition. In Figure S3C, mean KD/wt DoA values across conditions were compared by  
556 one-way ANOVA followed by Tukey's post-hoc tests.

557

### 558 **Other image analysis and statistical procedures**

559 Fluorescence intensity along lines were measured with Fiji on average Z-projections of confocal  
560 images and plotted with R Studio. Intensity values from each channel were normalized to 0-1 range.  
561 *BicD*, *GFP*, *Bsg25D* or *hook* mean fluorescence intensity along the A-B axis of the epithelium was  
562 measured in groups of 5-10 adjacent follicle cells as line plots. At least 3 line plots were generated for  
563 each RNA measured in each condition. The value corresponding to 50% of the cumulative area under  
564 the curve (a.u.c.) of each plot was considered as the variation of the respective RNA localization along  
565 the A-B axis of the epithelium. Welch two sample  $t$ -test was used to compare mean values of the 50%  
566 of the a.u.c with respect to untreated controls (pharmacological experiments) or in-frame *BicD-GFP*  
567 (*Frameshift* vs. *In-frame* variation).

568

569 **DATA AVAILABILITY**

570 The authors declare that all data supporting the findings of this study are available within the article  
571 and its supplementary information files or from the corresponding author upon reasonable request.

572 RNA-seq data have been deposited in the ArrayExpress database at EMBL-EBI

573 ([www.ebi.ac.uk/arrayexpress](http://www.ebi.ac.uk/arrayexpress)) under accession number E-MTAB-9127.

574

575 **AUTHOR CONTRIBUTIONS**

576 Conceptualization, L.C. and A.E.; Investigation, L.C.; Data Analysis, L.C; Writing – Original Draft, L.C.;

577 Writing – Review & Editing, L.C. and A.E; Supervision, A.E.; Funding Acquisition, A.E.

578

579 **ACKNOWLEDGEMENTS**

580 We thank the Bloomington Drosophila Stock Center (BDSC), J. M. Gomez Elliff, A. Debec, I. Gaspar,  
581 S. Bullock, J. R. Huynh and R. Lehmann for providing fly lines and reagents. We are grateful to I.

582 Gaspar for helpful discussions and K. Zarnack for training and advice in bioinformatic analysis. We

583 thank the EMBL GeneCore Facility (D. Pavlinic, V. Benes), Advanced Light Microscopy Facility (S.

584 Terjung), Drosophila Injection Service (A. Reversi), Centre for Bioimage Analysis (C. Tischer), W.

585 Huber and the Centre for Statistical Data Analysis (B. Klaus) and Genome Biology Computational

586 Support (C. Girardot) for their support. We are grateful to Kathi Zarnack, Paolo Ronchi, Luigi Russo,

587 Alessandra Reversi and members of the Ephrussi lab for critically reading the manuscript. This work

588 was supported by EMBL. L.C. was supported by DFG-FOR 2333 grants EP 37/2-1 and EP 37/4-1

589 from the Deutsche Forschungsgemeinschaft (Germany) to A.E.

590

591 **DECLARATION OF INTERESTS**

592 The authors declare no competing financial interests.

593

594 **REFERENCES**

595 Andrews S (2010). A Quality Control Tool for High Throughput Sequence Data [Online]. Available  
596 online at: <http://www.bioinformatics.babraham.ac.uk/projects/fastqc/>

597 Baumann S, König J, Koepke J, Feldbrügge M (2014) Endosomal transport of septin mRNA and  
598 protein indicates local translation on endosomes and is required for correct septin filamentation.  
599 *EMBO Rep* 15: 94–102

- 600 Bhagavatula S, Knust E (2021) A putative stem-loop structure in *Drosophila* crumbs is required for  
601 mRNA localisation in epithelia and germline cells. *J Cell Sci* 134
- 602 Blower MD, Feric E, Weis K, Heald R (2007) Genome-wide analysis demonstrates conserved  
603 localization of messenger RNAs to mitotic microtubules. *J Cell Biol* 179: 1365–1373
- 604 Bolger AM, Lohse M, Usadel B (2014) Trimmomatic: A flexible trimmer for Illumina sequence data.  
605 *Bioinformatics* 30: 2114–2120
- 606 Brendza RP, Serbus LR, Duffy JB, Saxton WM, Brendza RP, Serbus LR, Duffy JB, Saxton WM (2000)  
607 A Function for Kinesin I in the Posterior Transport of oskar mRNA and Staufen Protein. *Science*  
608 (80- ) 289: 2120–2122
- 609 Bullock SL, Nicol A, Gross SP, Zicha D (2006) Guidance of Bidirectional Motor Complexes by mRNA  
610 Cargoes through Control of Dynein Number and Activity. *Curr Biol* 16: 1447–1452
- 611 Bullock SL, Ish-Horowicz D (2001) Conserved signals and machinery for RNA transport in *Drosophila*  
612 oogenesis and embryogenesis. *Nature* 414: 611–616
- 613 Cavener DR (1987) Comparison of the consensus sequence flanking translational start sites in  
614 *Drosophila* and vertebrates. *Nucleic Acids Res* 15: 1353–1361
- 615 Cha B-J, Serbus LR, Koppetsch BS, Theurkauf WE (2002) Kinesin I-dependent cortical exclusion  
616 restricts pole plasm to the oocyte posterior. *Nat Cell Biol* 4: 592–598
- 617 Chen J, Suo S, Tam PP, Han JDJ, Peng G, Jing N (2017) Spatial transcriptomic analysis of  
618 cryosectioned tissue samples with Geo-seq. *Nat Protoc* 12: 566–580
- 619 Chowdhury S, Ketcham SA, Schroer TA, Lander GC (2015) Structural organization of the dynein-  
620 dynactin complex bound to microtubules. *Nat Struct Mol Biol* 22: 345–347
- 621 Cioni JM, Lin JQ, Holtermann A V., Koppers M, Jakobs MAH, Azizi A, Turner-Bridger B, Shigeoka T,  
622 Franze K, Harris WA, *et al* (2019) Late Endosomes Act as mRNA Translation Platforms and  
623 Sustain Mitochondria in Axons. *Cell* 176: 56–72
- 624 Clark A, Meignin C, Davis I (2007) A Dynein-dependent shortcut rapidly delivers axis determination  
625 transcripts into the *Drosophila* oocyte. *Development* 134: 1955–1965
- 626 Clark IE, Jan LY, Jan YN (1997) Reciprocal localization of nod and kinesin fusion proteins indicates  
627 microtubule polarity in the *Drosophila* oocyte, epithelium, neuron and muscle. *Development* 124:  
628 461–470
- 629 Cohen B, Golani-Armon A, Altman T, Savulescu AF, Mhlanga MM, Perlson E, Arava YS (2021)  
630 Mitochondria serve as axonal shuttle for Cox7c mRNA through mechanism that involves its  
631 mitochondrial targeting signal. *bioRxiv*: 2021.05.19.444640
- 632 Corradi E, Dalla Costa I, Gavoci A, Iyer A, Rocuzzo M, Otto TA, Oliani E, Bridi S, Strohbuecker S,  
633 Santos-Rodriguez G, *et al* (2020) Axonal precursor miRNAs hitchhike on endosomes and locally  
634 regulate the development of neural circuits. *EMBO J* 39: 1–24
- 635 Coutelis JB, Ephrussi A (2007) Rab6 mediates membrane organization and determinant localization  
636 during *Drosophila* oogenesis. *Development* 134: 1419–1430
- 637 Delanoue R, Davis I (2005) Dynein anchors its mRNA cargo after apical transport in the *Drosophila*  
638 blastoderm embryo. *Cell* 122: 97–106

- 639 Delanoue R, Herpers B, Soetaert J, Davis I, Rabouille C (2007) Drosophila Squid/hnRNP Helps  
640 Dynein Switch from a gurken mRNA Transport Motor to an Ultrastructural Static Anchor in  
641 Sponge Bodies. *Dev Cell* 13: 523–538
- 642 Dienstbier M, Boehl F, Li X, Bullock SL (2009) Egalitarian is a selective RNA-binding protein linking  
643 mRNA localization signals to the dynein motor. *Genes Dev* 23: 1546–1558
- 644 Dimitrova-Paternoga L, Jagtap PKA, Cyrklaff A, Vaishali, Lapouge K, Sehr P, Perez K, Heber S, Löw  
645 C, Hennig J, *et al* (2021) Molecular basis of mRNA transport by a kinesin-1-atypical tropomyosin  
646 complex. *Genes Dev* 35: 1–16
- 647 Dobin A, Davis CA, Schlesinger F, Drenkow J, Zaleski C, Jha S, Batut P, Chaisson M, Gingeras TR  
648 (2013) STAR: Ultrafast universal RNA-seq aligner. *Bioinformatics* 29: 15–21
- 649 Erdélyi M, Michon AM, Guichet A, Glotzer JB, Ephrussi A (1995) Requirement for Drosophila  
650 cytoplasmic tropomyosin in oskar mRNA localization. *Nature* 377: 524–527
- 651 Gardiol A, St Johnston D (2014) Staufen targets coracle mRNA to Drosophila neuromuscular junctions  
652 and regulates GluRIIA synaptic accumulation and bouton number. *Dev Biol* 392: 153–167
- 653 Gáspár I, Phea LJ, Ephrussi A (2021) Egalitarian feeds forward to Staufen to inhibit Dynein during  
654 mRNP transport. *bioRxiv*: 2021.04.24.441269
- 655 Gáspár I, Sysoev V, Komissarov A, Ephrussi A (2016) An RNA-binding atypical tropomyosin recruits  
656 kinesin-1 dynamically to oskar mRNPs. *EMBO J* 36: 319–333
- 657 Gáspár I, Wippich F, Ephrussi A (2017) Enzymatic production of single-molecule FISH and RNA  
658 capture probes. *Rna* 23: 1582–1591
- 659 Ghosh S, Obrdlík A, Marchand V, Ephrussi A (2014) The EJC Binding and Dissociating Activity of  
660 PYM Is Regulated in Drosophila. *PLoS Genet* 10: e1004455
- 661 Goldspink DA, Rookyard C, Tyrrell BJ, Gadsby J, Perkins J, Lund EK, Galjart N, Thomas P, Wileman  
662 T, Mogensen MM (2017) Ninein is essential for apico-basal microtubule formation and CLIP-170  
663 facilitates its redeployment to non-centrosomal microtubule organizing centres. *Open Biol* 7
- 664 González-Reyes A, St Johnston D (1998) Patterning and morphogenesis of the follicle cell epithelium  
665 during Drosophila oogenesis. *Development* 125: 2837–2846
- 666 Gu Z, Eils R & Schlesner M (2016) Complex heatmaps reveal patterns and correlations in  
667 multidimensional genomic data. *Bioinformatics* 32: 2847–2849
- 668 Hachet O, Ephrussi A (2001) Drosophila Y14 shuttles to the posterior of the oocyte and is required for  
669 oskar mRNA transport. *Curr Biol* 11: 1666–1674
- 670 Hampoelz B, Schwarz A, Ronchi P, Bragulat-Teixidor H, Tischer C, Gaspar I, Ephrussi A, Schwab Y,  
671 Beck M (2019) Nuclear Pores Assemble from Nucleoporin Condensates During Oogenesis. *Cell*  
672 179: 671–686.e17
- 673 Hancock WO (2014) Bidirectional cargo transport: Moving beyond tug of war. *Nat Rev Mol Cell Biol*  
674 15: 615–628
- 675 Harbauer AB, Wanderoy S, Hees JT, Gibbs W, Ordonez M, Cai Z, Cartoni R, Ashrafi G, Wang C, He  
676 Z, *et al* (2021) Neuronal mitochondria transport Pink1 mRNA via Synaptojanin 2 to support local  
677 mitophagy. *bioRxiv*: 2021.05.19.444778

- 678 Hoogenraad CC, Akhmanova A, Howell SA, Dortland BR, De Zeeuw CI, Willemsen R, Visser P,  
679 Grosveld F, Galjart N (2001) Mammalian golgi-associated Bicaudal-D2 functions in the dynein-  
680 dyndactin pathway by interacting with these complexes. *EMBO J* 20: 4041–4054
- 681 Hoogenraad CC, Wulf P, Schiefermeier N, Stepanova T, Galjart N, Small JV, Grosveld F, De Zeeuw  
682 CI, Akhmanova A (2003) Bicaudal D induces selective dynein-mediated microtubule minus end-  
683 directed transport. *EMBO J* 22: 6004–6015
- 684 Horne-Badovinac S, Bilder D (2008) Dynein regulates epithelial polarity and the apical localization of  
685 stardust A mRNA. *PLoS Genet* 4: 0040–0051
- 686 Hughes JR, Bullock SL, Ish-Horowicz D (2004) inscuteable mRNA Localization Is Dynein-Dependent  
687 and Regulates Apicobasal Polarity and Spindle Length in Drosophila Neuroblasts. *Curr Biol* 14:  
688 1950–1956
- 689 Jambor H, Mueller S, Bullock SL, Ephrussi A (2014) A stem-loop structure directs oskar mRNA to  
690 microtubule minus ends. *Rna* 20: 429–439
- 691 Jambor H, Surendranath V, Kalinka AT, Meistrick P, Saalfeld S, Tomancak P (2015) Systematic  
692 imaging reveals features and changing localization of mRNAs in Drosophila development. *Elife*  
693 4: 1–22
- 694 Januschke J, Nicolas E, Compagnon J, Formstecher E, Goud B, Guichet A (2007) Rab6 and the  
695 secretory pathway affect oocyte polarity in Drosophila. *Development* 134: 3419–3425
- 696 Karlin-McGinness M, Serano TL, Cohen RS (1996) Comparative Analysis of the Kinetics and  
697 Dynamics of K10, bicoid, and oskar mRNA Localization in the Drosophila Oocyte. *Dev Genet* 19:  
698 238–248
- 699 Khanal I, Elbediwy A, de la Loza M del CD, Fletcher GC, Thompson BJ (2016) Shot and Patronin  
700 polarise microtubules to direct membrane traffic and biogenesis of microvilli in epithelia. *J Cell*  
701 *Sci* 129: 2651–2659
- 702 Kopylova E, Noé L, Touzet H (2012) SortMeRNA: Fast and accurate filtering of ribosomal RNAs in  
703 metatranscriptomic data. *Bioinformatics* 28: 3211–3217
- 704 Kwon OS, Mishra R, Safieddine A, Coleno E, Alasseur Q, Faucourt M, Barbosa I, Bertrand E, Spassky  
705 N, Le Hir H (2021) Exon junction complex dependent mRNA localization is linked to centrosome  
706 organization during ciliogenesis. *Nat Commun* 12: 1–16
- 707 Larkin A, Marygold SJ, Antonazzo G, Attrill H, dos Santos G, Garapati P V, Goodman JL, Gramates  
708 LS, Millburn G, Strelets VB, *et al* (2021) FlyBase: updates to the Drosophila melanogaster  
709 knowledge base. *Nucleic Acids Res* 49: D899–D907
- 710 Lécuyer E, Yoshida H, Parthasarathy N, Alm C, Babak T, Cerovina T, Hughes TR, Tomancak P,  
711 Krause HM (2007) Global Analysis of mRNA Localization Reveals a Prominent Role in  
712 Organizing Cellular Architecture and Function. *Cell* 131: 174–187
- 713 Lee I-G, Cason SE, Alqassim SS, Holzbaur ELF, Dominguez R (2020) A tunable LIC1-adaptor  
714 interaction modulates dynein activity in a cargo-specific manner. *Nat Commun* 11: 5695
- 715 Li Z, Wang L, Hays TS, Cai Y (2008) Dynein-mediated apical localization of crumbs transcripts is  
716 required for Crumbs activity in epithelial polarity. *J Cell Biol* 180: 31–38
- 717 Liao YC, Fernandopulle MS, Wang G, Choi H, Hao L, Drerup CM, Patel R, Qamar S, Nixon-Abell J,  
718 Shen Y, *et al* (2019) RNA Granules Hitchhike on Lysosomes for Long-Distance Transport, Using  
719 Annexin A11 as a Molecular Tether. *Cell* 179: 147–164



- 720 Liao Y, Smyth GK, Shi W (2014) FeatureCounts: An efficient general purpose program for assigning  
721 sequence reads to genomic features. *Bioinformatics* 30: 923–930
- 722 Love MI, Huber W, Anders S (2014) Moderated estimation of fold change and dispersion for RNA-seq  
723 data with DESeq2. *Genome Biol* 15: 1–21
- 724 Mach JM, Lehmann R (1997) An Egalitarian-BicaudalD Complex Is Essential for Oocyte Specification  
725 and Axis Determination in *Drosophila*. *Genes Dev* 11: 423–435
- 726 Matanis T, Akhmanova A, Wulf P, Del Nery E, Weide T, Stepanova T, Galjart N, Grosveld F, Goud B,  
727 De Zeeuw CI, *et al* (2002) Bicaudal-D regulates COPI-independent Golgi-ER transport by  
728 recruiting the dynein-dynactin motor complex. *Nat Cell Biol* 4: 986–992
- 729 McKenney RJ, Huynh W, Tanenbaum ME, Bhabha G, Vale RD (2014) Activation of cytoplasmic  
730 dynein motility by dynactin-cargo adapter complexes. *Science (80- )* 345: 337–341
- 731 Medioni C, Mowry K, Besse F (2012) Principles and roles of mRNA localization in animal  
732 development. *Development* 139: 3263–3276
- 733 Mili S, Moissoglu K, Macara IG (2008) Genome-wide screen reveals APC-associated RNAs enriched  
734 in cell protrusions. *Nature* 453: 115–119
- 735 Mohr SE, Dillon ST, Boswell RE (2001) The RNA-binding protein Tsunagi interacts with Mago Nashi to  
736 establish polarity and localize oskar mRNA during *Drosophila* oogenesis. *Genes Dev* 15: 2886–  
737 2899
- 738 Moor AE, Golan M, Massasa EE, Lemze D, Weizman T, Shenhav R, Baydatch S, Mizrahi O, Winkler  
739 R, Golani O, *et al* (2017) Global mRNA polarization regulates translation efficiency in the  
740 intestinal epithelium. *Science (80- )* 357: 1299–1303
- 741 Nakamura A, Amikura R, Hanyu K, Kobayashi S (2001) Me31B silences translation of oocyte-  
742 localizing RNAs through the formation of cytoplasmic RNP complex during *Drosophila*  
743 oogenesis. *Development* 128: 3233–3242
- 744 Navarro C, Puthalakath H, Adams JM, Strasser A, Lehmann R (2004) Egalitarian binds dynein light  
745 chain to establish oocyte polarity and maintain oocyte fate. *Nat Cell Biol* 6: 427–435
- 746 Newmark PA, Boswell RE (1994) The mago nashi locus encodes an essential product required for  
747 germ plasm assembly in *Drosophila*. *Development* 120: 1303–1313
- 748 Olenick MA, Holzbaur ELF (2019) Dynein activators and adaptors at a glance. *J Cell Sci* 132
- 749 Palacios IM, Gatfield D, St. Johnston D, Izaurralde E (2004) An eIF4AIII-containing complex required  
750 for mRNA localization and nonsense-mediated mRNA decay. *Nature* 427: 753–757
- 751 Pignoni F, Zipursky SL (1997) Induction of *Drosophila* eye development by decapentaplegic.  
752 *Development* 124: 271–278
- 753 Redwine WB, DeSantis ME, Hollyer I, Htet ZM, Tran PT, Swanson SK, Florens L, Washburn MP,  
754 Reck-Peterson SL (2017) The human cytoplasmic dynein interactome reveals novel activators of  
755 motility. *Elife* 6: 1–27
- 756 Robinson J, Thorvaldsdóttir H, Winckler W, Guttman M, Lander ES, Getz G, Mesirov JP (2011)  
757 Integrative genomics viewer. *Nat Biotechnol* 29: 24–26 doi:10.1038/nbt.1754

- 758 Ronchi P, Mizzon G, Machado P, D'Imprima E, Best BT, Cassella L, Schnorrenberg S, Montero MG,  
759 Jechlinger M, Ephrussi A, *et al* (2021) High-precision targeting workflow for volume electron  
760 microscopy. *J Cell Biol* 220
- 761 Safieddine A, Coleno E, Salloum S, Imbert A, Traboulsi AM, Kwon OS, Lionneton F, Georget V,  
762 Robert MC, Gostan T, *et al* (2021) A choreography of centrosomal mRNAs reveals a conserved  
763 localization mechanism involving active polysome transport. *Nat Commun* 12: 1–21
- 764 Schindelin J, Arganda-Carreras I, Frise E, Kaynig V, Longair M, Pietzsch T, Preibisch S, Rueden C,  
765 Saalfeld S, Schmid B, *et al* (2012) Fiji: An open-source platform for biological-image analysis.  
766 *Nat Methods* 9: 676–682
- 767 Schlager MA, Serra-Marques A, Grigoriev I, Gummy LF, da Silva ME, Wulf PS, Akhmanova A,  
768 Hoogenraad CC (2014) Bicaudal D Family Adaptor Proteins Control the Velocity of Dynein-  
769 Based Movements. *Cell Rep* 8: 1248–1256
- 770 Schotman H, Karhinen L, Rabouille C (2008) dGRASP-Mediated Noncanonical Integrin Secretion Is  
771 Required for Drosophila Epithelial Remodeling. *Dev Cell* 14: 171–182
- 772 Schroeder CM, Vale RD (2016) Assembly and activation of dynein-dynactin by the cargo adaptor  
773 protein Hook3. *J Cell Biol* 214: 309–318
- 774 Sepulveda G, Antkowiak M, Brust-Mascher I, Mahe K, Ou T, Castro NM, Christensen LN, Cheung L,  
775 Jiang X, Yoon D, *et al* (2018) Co-translational protein targeting facilitates centrosomal  
776 recruitment of PCNT during centrosome maturation in vertebrates. *Elife* 7: 1–28
- 777 Serano J, Rubin GM (2003) The Drosophila synaptotagmin-like protein bitesize is required for growth  
778 and has mRNA localization sequences within its open reading frame. *Proc Natl Acad Sci U S A*  
779 100: 13368–13373
- 780 Shepard KA, Gerber AP, Jambhekar A, Takizawa PA, Brown PO, Herschlag D, DeRisi JL, Vale RD  
781 (2003) Widespread cytoplasmic mRNA transport in yeast: Identification of 22 bud-localized  
782 transcripts using DNA microarray analysis. *Proc Natl Acad Sci U S A* 100: 11429–11434
- 783 Sladewski TE, Billington N, Ali MY, Bookwalter CS, Lu H, Kremntsova EB, Schroer TA, Trybus KM  
784 (2018) Recruitment of two dyneins to an mRNA-dependent bicaudal D transport complex. *Elife* 7:  
785 e36306
- 786 Steinhauer J, Kalderon D (2006) Microtubule polarity and axis formation in the Drosophila oocyte. *Dev*  
787 *Dyn an Off Publ Am Assoc Anat* 235: 1455–1468
- 788 Struhl G, Basler K (1993) Organizing activity of wingless protein in Drosophila. *Cell* 72: 527–540
- 789 Stuurman N, Häner M, Sasse B, Hübner W, Suter B, Aebi U (1999) Interactions between coiled-coil  
790 proteins: Drosophila lamin Dm0 binds to the Bicaudal-D protein. *Eur J Cell Biol* 78: 278–287
- 791 Suter B, Steward R (1991) Requirement for phosphorylation and localization of the Bicaudal-D protein  
792 in Drosophila oocyte differentiation. *Cell* 67: 917–926
- 793 Tillery MML, Blake-Hedges C, Zheng Y, Buchwalter RA, Megraw TL (2018) Centrosomal and Non-  
794 Centrosomal Microtubule-Organizing Centers (MTOCs) in Drosophila melanogaster. *Cells* 7: 121
- 795 Torisawa T, Ichikawa M, Furuta A, Saito K, Oiwa K, Kojima H, Toyoshima YY, Furuta K (2014)  
796 Autoinhibition and cooperative activation mechanisms of cytoplasmic dynein. *Nat Cell Biol* 16:  
797 1118–1124



- 798 Trokter M, Mücke N, Surrey T (2012) Reconstitution of the human cytoplasmic dynein complex. *Proc*  
799 *Natl Acad Sci* 109: 20895 LP – 20900
- 800 Urnavicius L, Zhang K, Diamant AG, Motz C, Schlager MA, Yu M, Patel NA, Robinson C V, Carter AP  
801 (2015) The structure of the dynactin complex and its interaction with dynein. *Science* 347: 1441–  
802 1446
- 803 Van de Bor V, Zimniak G, Cérézo D, Schaub S, Noselli S (2011) Asymmetric localisation of cytokine  
804 mRNA is essential for JAK/STAT activation during cell invasiveness. *Development* 138: 1383–  
805 1393
- 806 Vazquez-Pianzola P, Schaller B, Colombo M, Beuchle D, Neuenschwander S, Marcil A, Bruggmann  
807 R, Suter B (2017) The mRNA transportome of the BicD/Egl transport machinery. *RNA Biol* 14:  
808 73–89
- 809 Wharton RP, Struhl G (1989) Structure of the *Drosophila* BicaudalD protein and its role in localizing  
810 the posterior determinant nanos. *Cell* 59: 881–892
- 811 Wilk R, Hu J, Blotsky D, Krause HM (2016) Diverse and pervasive subcellular distributions for both  
812 coding and long noncoding RNAs. *Genes Dev* 30: 594–609
- 813 Wilkie GS, Davis I (2001) *Drosophila* wingless and pair-rule transcripts localize apically by dynein-  
814 mediated transport of RNA particles. *Cell* 105: 209–219
- 815 Xing L, Bassell GJ (2013) mRNA localization: An orchestration of assembly, traffic and synthesis.  
816 *Traffic* 14: 2–14
- 817 Zhang K, Foster HE, Rondelet A, Lacey SE, Bahi-Buisson N, Bird AW, Carter AP (2017) Cryo-EM  
818 Reveals How Human Cytoplasmic Dynein Is Auto-inhibited and Activated. *Cell* 169: 1303-  
819 1314.e18
- 820 Zimyanin VL, Belaya K, Pecreaux J, Gilchrist MJ, Clark A, Davis I, St Johnston D (2008) In Vivo  
821 Imaging of oskar mRNA Transport Reveals the Mechanism of Posterior Localization. *Cell* 134:  
822 843–853
- 823

824 MAIN FIGURES AND LEGENDS

825 Figure 1

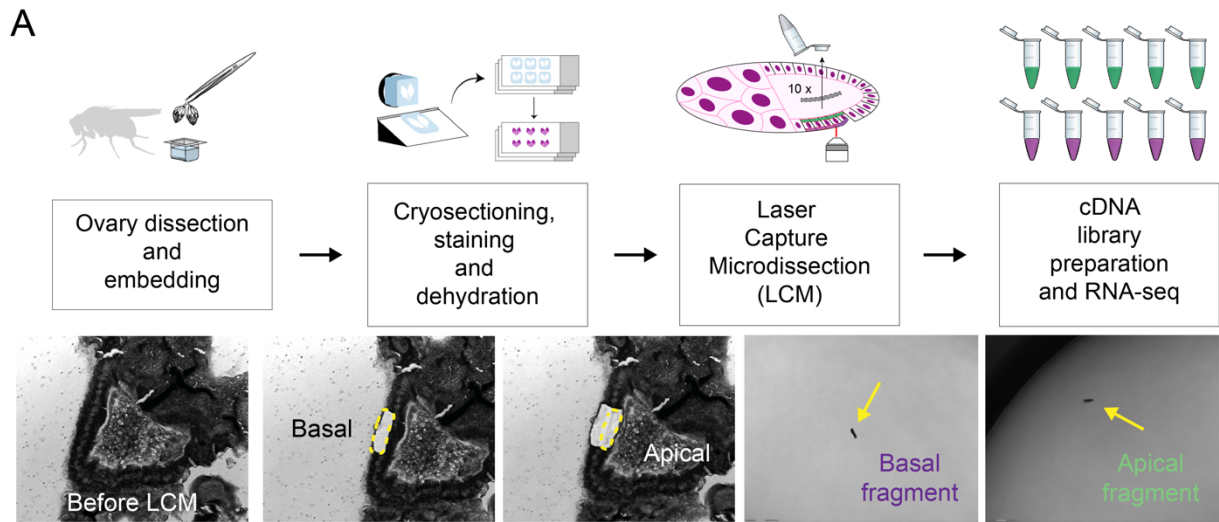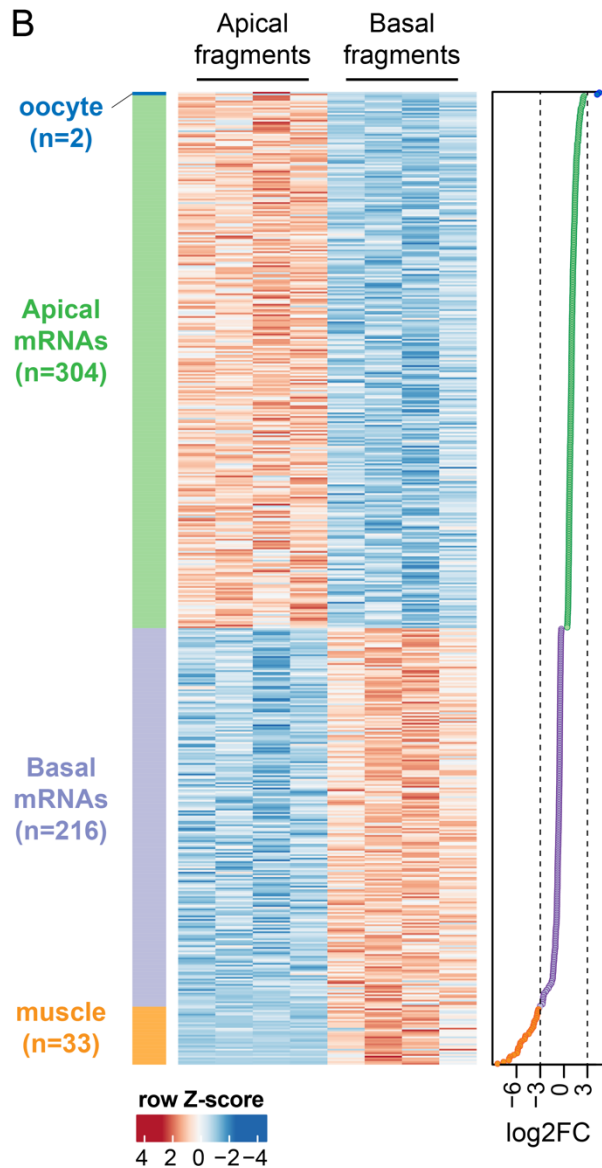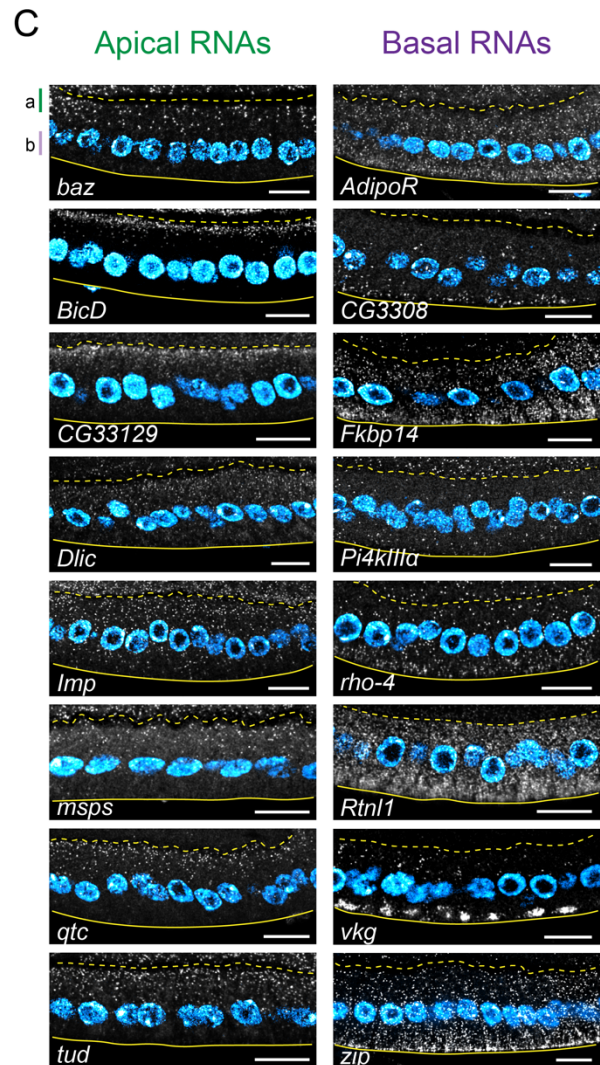

826

827 **Figure 1. Identification of apical and basal RNAs in *Drosophila* follicular epithelium by**  
828 **subcellular spatial transcriptomics.** A) Schematic representation of the sample preparation  
829 procedure. Lower panels: representative images of an egg chamber before and after apical and basal  
830 fragment microdissection, including visualization of microdissected fragments in the cap of collection  
831 tubes. B) Heatmap representing RNA-seq signal (z-score of normalized read counts) for significantly  
832 enriched RNAs in microdissected apical and basal fragments (FDR < 0.1). Each row represents a  
833 significantly enriched RNA in either apical samples (n=4) or basal samples (n=4). The log<sub>2</sub>FC value of  
834 each RNA showed in the heatmap is indicated in the graph on the right. Dashed lines indicate  
835 threshold log<sub>2</sub>FC values (log<sub>2</sub>FC < -3 and log<sub>2</sub>FC > 3) arbitrarily set to identify oocyte contaminants  
836 (log<sub>2</sub>FC > 3, n=2, blue), *bona fide* apical RNAs (0 < log<sub>2</sub>FC ≤ 3, n=304, green), *bona fide* basal RNAs  
837 (-3 ≤ log<sub>2</sub>FC < 0, n=216, purple), and muscle contaminants (log<sub>2</sub>FC ≤ -3, n=33, orange). C) smFISH  
838 validation of 16 *bona fide* apical (left panels) and basal (right panels) RNAs. A dashed line and a  
839 continuous line in each panel delimit the FC-oocyte and FC-basal lamina borders respectively. a =  
840 apical domain; b = basal domain. Nuclei (cyan) are stained with DAPI. Scale bars 10 μm. See also  
841 Figure S1, Table S1 and Video S1.  
842  
843

844 **Figure 2**

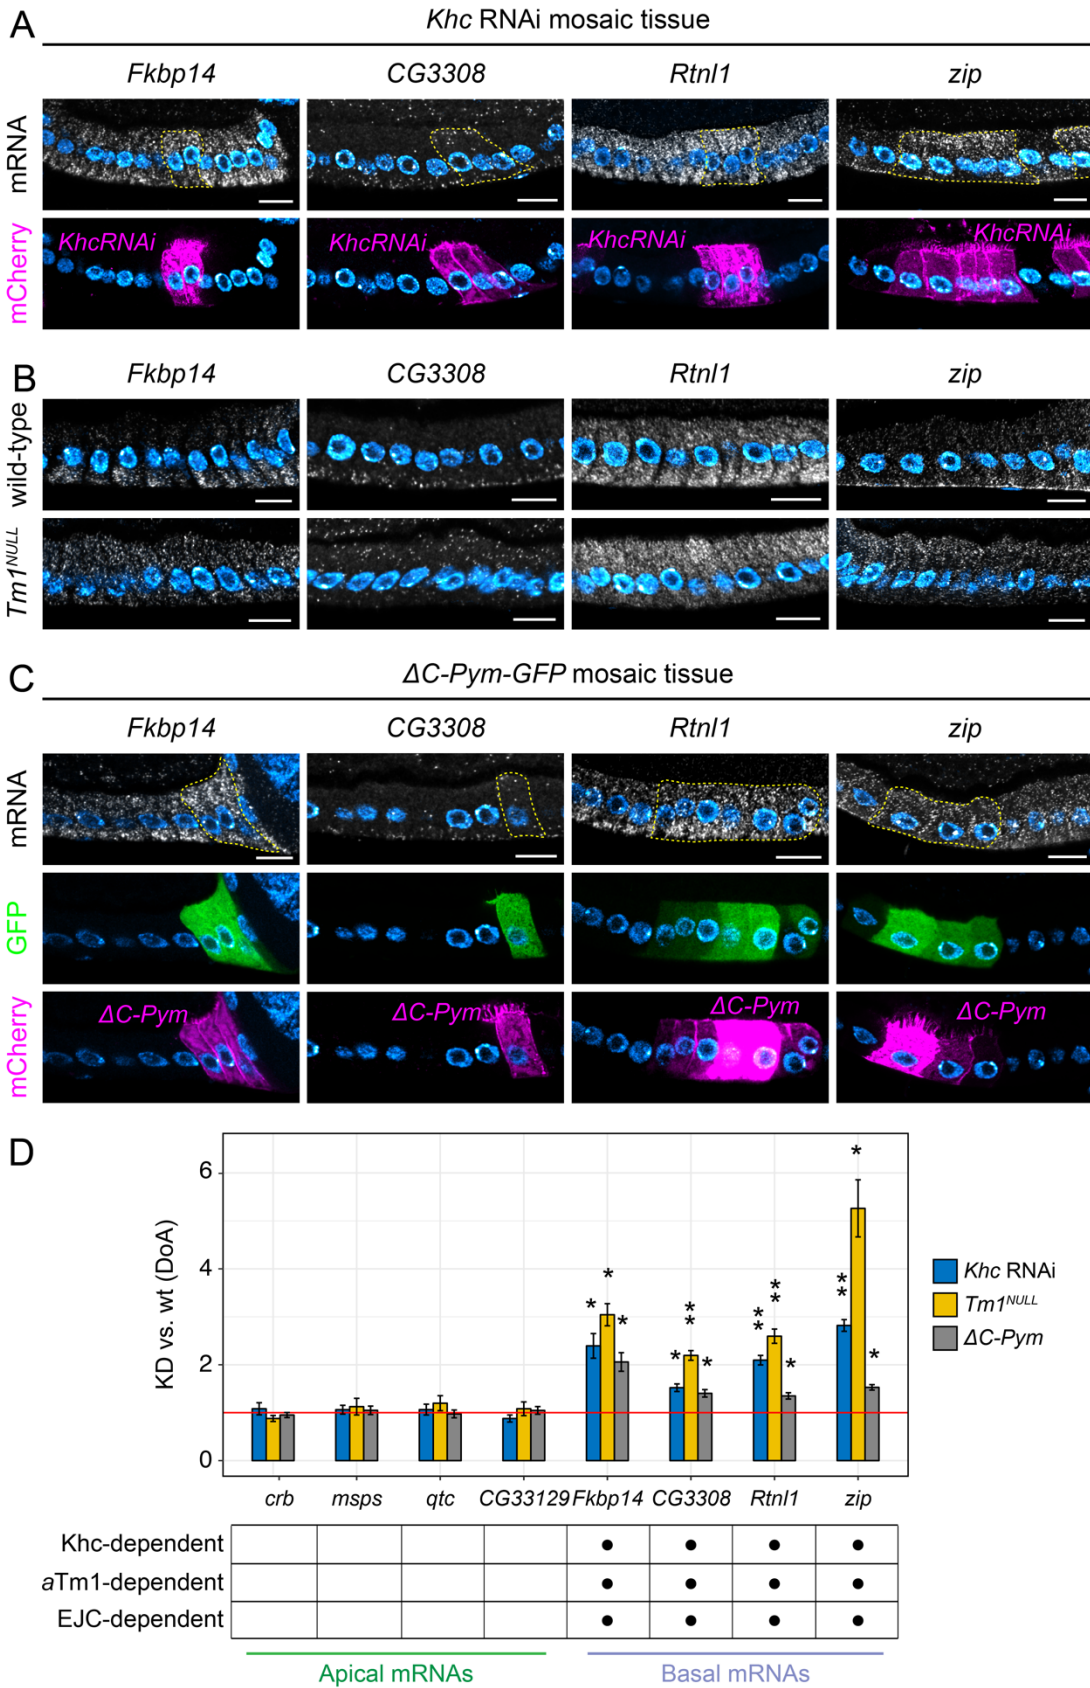

845

846

847 **Figure 2. Basal RNA localization depends on kinesin-1, aTm1, and the EJC.**

848 In A) and C), mutant cells (marked with CD8-mCherry, lower panels) were generated by the UAS/Gal4  
849 FLP-out system by inducing *Khc* RNAi (A) or by expressing the EJC-disrupting protein  $\Delta C$ -Pym (C), to  
850 disrupt each component without significantly affecting tissue architecture. Neighboring wild-type cells  
851 are unmarked. A dashed line highlights mutant cells in smFISH images (upper panels). In B) the  
852 expression of the aTm1 isoform was specifically knocked down by generating *Tm1<sup>eg9</sup>/Tm1<sup>eg1</sup>*  
853 (*Tm1<sup>NULL</sup>*) egg chambers. A) Localization of basal RNAs by smFISH in *Khc* RNAi mosaic tissue. B)  
854 Localization of basal RNAs by smFISH in wild-type and *Tm1<sup>NULL</sup>* egg chambers. C) Localization of  
855 basal RNAs by smFISH in  $\Delta C$ -Pym-GFP mosaic tissue. D) Quantification of changes in the A-B  
856 distribution of apical and basal RNAs in conditions of downregulated kinesin-1 transport. Analyzed  
857 RNAs are indicated on the x-axis. The y-axis shows the average values ( $\pm$  s.e.m) of the ratio between  
858 the Degree of Apicality (DoA) measured in knock-down (KD) cells and the DoA measured in wild-type  
859 (wt) cells for each RNA analyzed, in each of the three conditions. The mean KD/wt(DoA) value for  
860 each RNA in each condition was tested against a null hypothesis  $H_0$  of KD/wt(DoA)=1 (red horizontal  
861 line), corresponding to no change between mutant and wild-type cells (one-sample t-test). Asterisks  
862 indicate mean values that significantly differ from the reference value of  $\mu=1$  (\*=p<0.05; \*\*=p<0.01;  
863 \*\*\*=p<0.001). Nuclei (cyan) are stained with DAPI. Scale bars 10  $\mu$ m. See also Figure S2 and Figure  
864 S3.

865



866 **Figure 3**

867

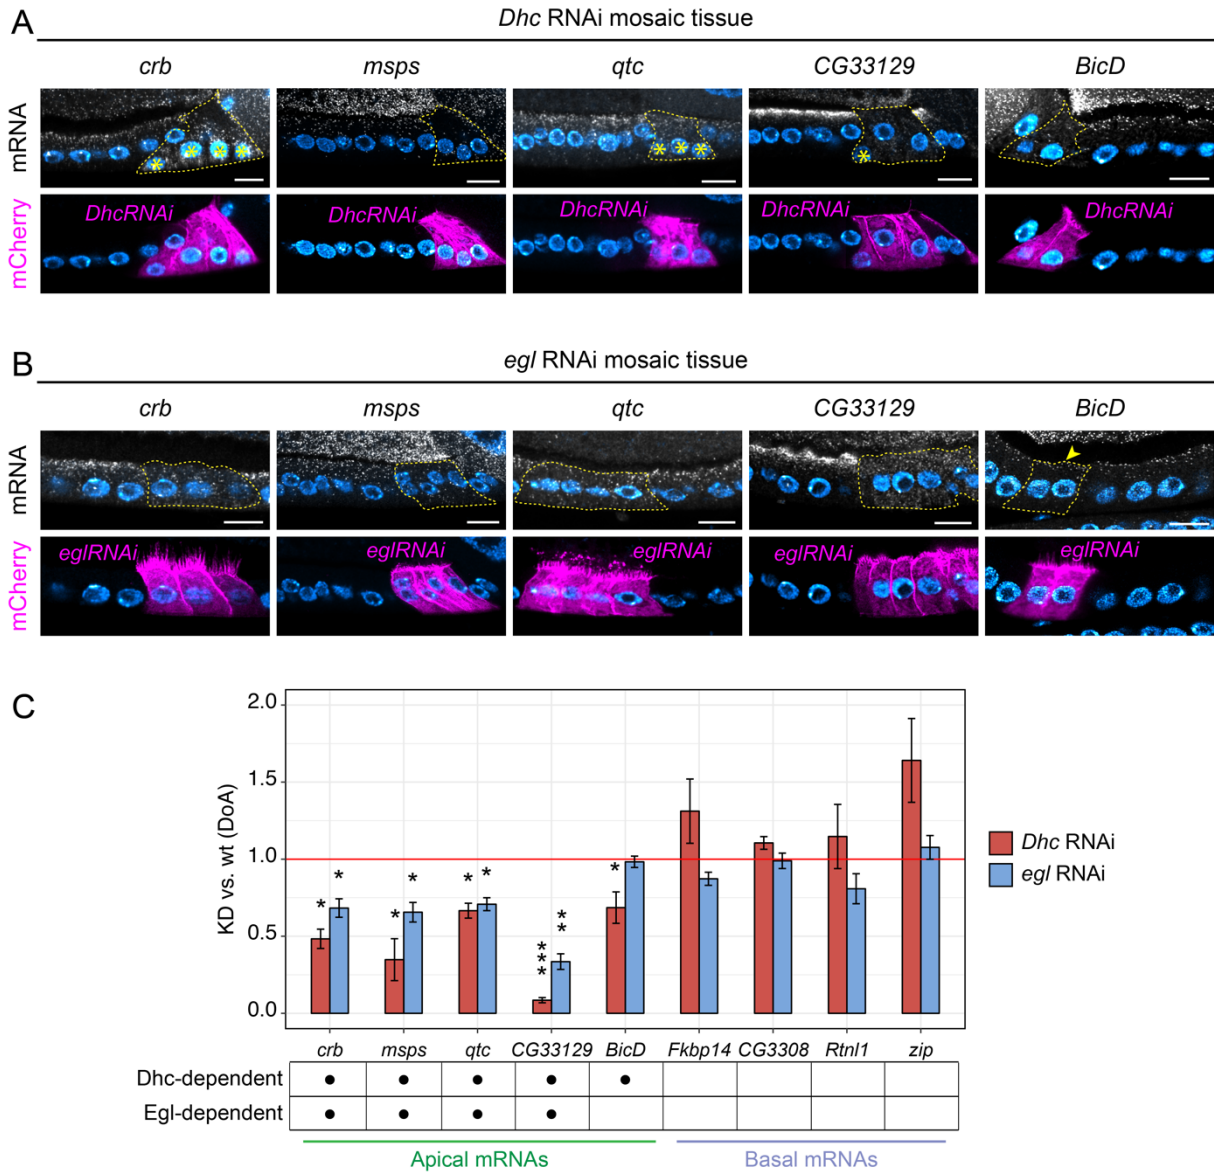

868

869

870 **Figure 3. Two different dynein-dependent mechanisms control apical RNA localization.**

871 A-B) Localization of apical RNAs by smFISH in *Dhc* RNAi (A) and *egl* RNAi mosaic tissue (B). Mutant  
872 cells are marked by the expression of CD8-mCherry (lower panels) and highlighted with a dashed line  
873 in smFISH images (upper panels). Neighboring wild-type cells are unmarked. Asterisks (\*) indicate  
874 basal mispositioning of nuclei due to *Dhc* RNAi, an indication of mild cell polarity defects. The  
875 arrowhead in B) indicates the persistence of apical *BicD* RNA in *egl* RNAi cells. C) Quantification of  
876 changes in the A-B distribution of apical and basal RNAs in conditions of downregulated  
877 dynein/*BicD*/*Egl* transport (*Dhc* RNAi or *egl* RNAi). Analyzed RNAs are indicated on the x-axis. The y-  
878 axis shows the average values ( $\pm$  s.e.m) of the KD/wt ratio (DoA) for each RNA analyzed, in each of  
879 the two conditions. The mean KD/wt(DoA) value for each RNA in each condition was tested against a  
880 value of KD/wt(DoA)=1 (red horizontal line), corresponding to no change between mutant and wild-  
881 type cells (one-sample t-test). Asterisks indicate mean values that significantly differ from the  
882 reference value of  $\mu=1$  (\*= $p<0.05$ ; \*\*= $p<0.01$ ; \*\*\*= $p<0.001$ ). Nuclei (cyan) are stained with DAPI.  
883 Scale bars 10  $\mu$ m. See also Figure S4.

884

885 **Figure 4**

886

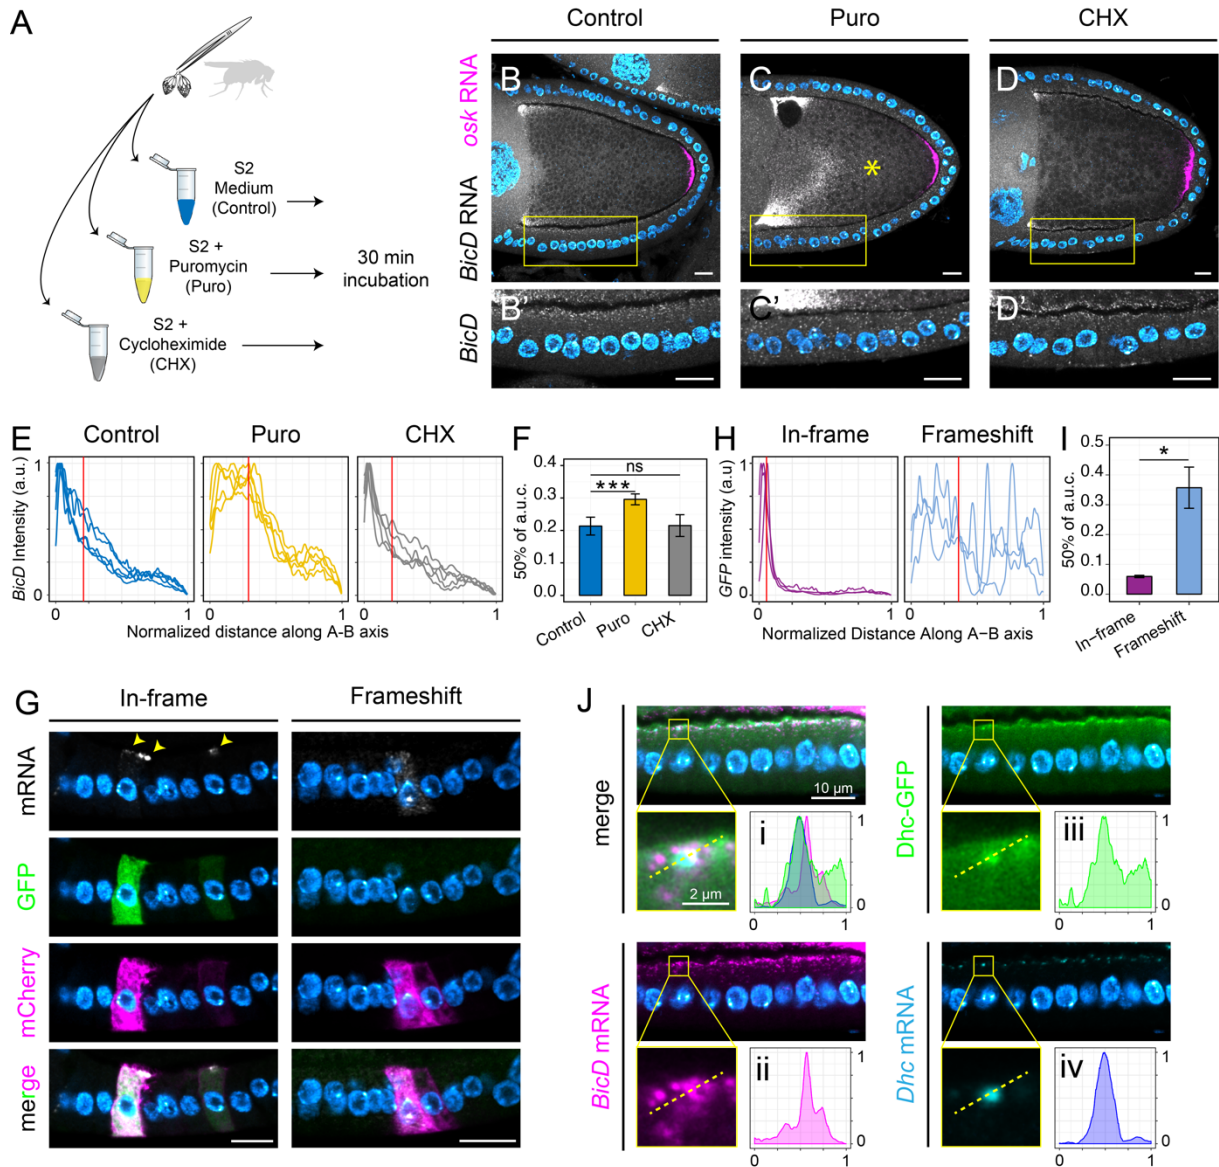

887

888



889 **Figure 4. *BicD* RNA is co-translationally localized at cortical Dhc foci.** A) Schematic  
890 representation of the *ex vivo* treatment of wild-type ovaries with pharmacological inhibitors of  
891 translation. B-D) Dual-color *BicD* (grayscale) and *osk* (magenta) smFISH experiments on Control (B-  
892 B'), Puro- (C-C') or CHX-treated (D-D') ovaries. Insets show a magnification of the follicular epithelium  
893 (bottom panels). Note the mislocalization of *BicD* RNA towards the center of the oocyte (\*) in C). E)  
894 Quantification of *BicD* RNA distribution along a linear ROI spanning the apical-basal axis of follicle  
895 cells measured as smFISH fluorescence intensity in control (blue), Puro (yellow) and CHX (grey)  
896 conditions. A red vertical line represents the mean x value corresponding to the 50% of the cumulative  
897 area under the curve (a.u.c.), a proxy for *BicD* degree of mislocalization. F) Statistical analysis of *BicD*  
898 degree of mislocalization (mean a.u.c.  $\pm$  s.e.m) in each condition compared to control. Control-Puro:  
899  $p=0.000879$  (\*\*\*) ; Control-CHX:  $p=0.9374$  (ns). G) Expression of different *BicD-GFP* constructs ("*In-*  
900 *frame*": <sup>0</sup>*BicD-GFP*; "*Frameshift*": <sup>(-1)</sup>*BicD-GFP* or <sup>(+1)</sup>*BicD-GFP*) in FC clones and analysis of  
901 transgenic RNA distribution by smFISH with antisense GFP probes. Follicle cell clones expressing  
902 each *BicD-GFP* construct are marked by CD8-mCherry (magenta). H) Quantification of *In-frame*  
903 (purple) or *Frameshift* (light blue) *BicD-GFP* RNA distribution. I) Statistical analysis of *BicD-GFP*  
904 degree of mislocalization (mean a.u.c.  $\pm$  s.e.m) in *Frameshift* compared to *In-frame* construct.  $p=$   
905  $0.01719$  (\*). J) Localization of *BicD* RNA (magenta), *Dhc* RNA (cyan), and endogenously tagged Dhc-  
906 GFP (green) in stage 10 follicular epithelium. Insets show a magnification of a single Dhc-GFP/*Dhc*  
907 RNA focus. A dashed line indicates the cross-section along which each signal was measured (panels  
908 i-iv). Signal intensities (y-axis) and line length (x-axis) were normalized in the 0-1 range. Nuclei (cyan)  
909 are stained with DAPI. Scale bars 10  $\mu$ m unless otherwise specified. See also Figure S5 and Figure  
910 S6.  
911

912 **Figure 5**

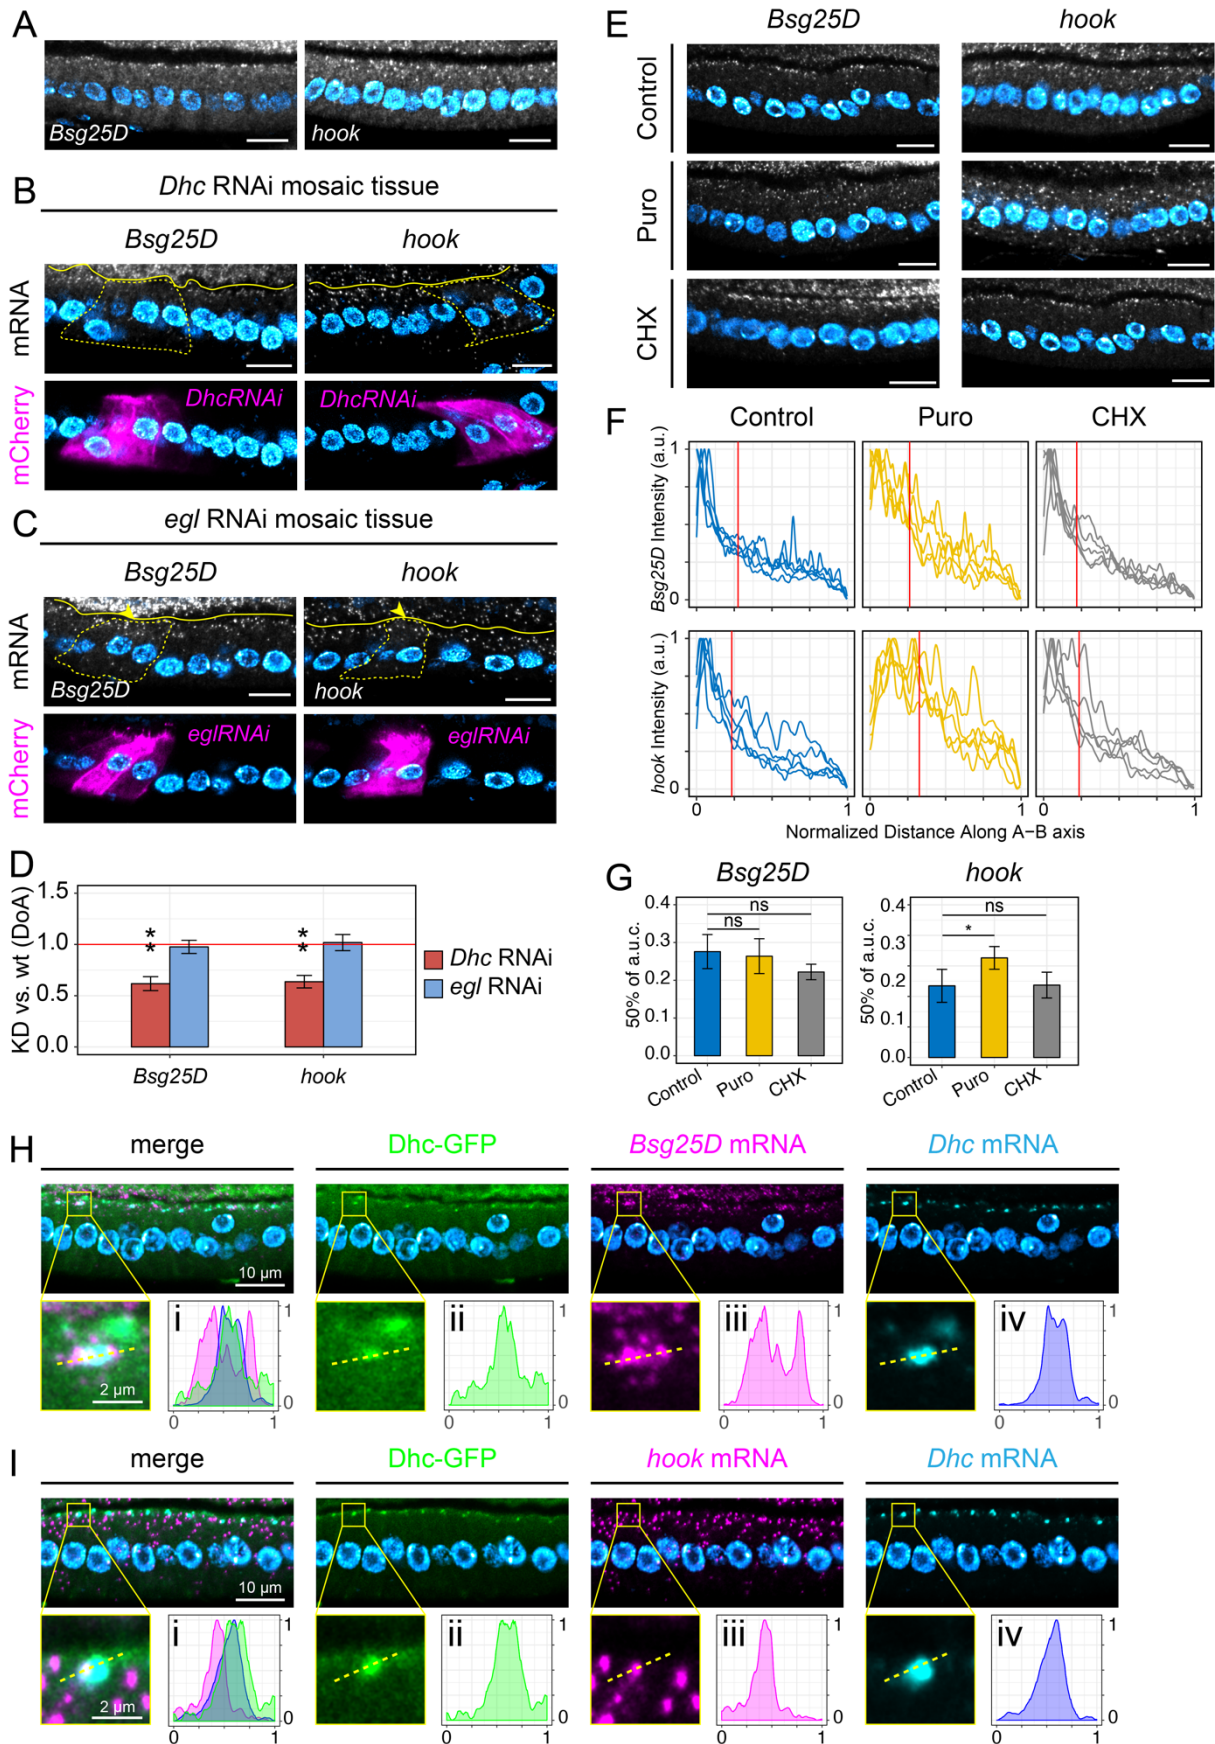

913

914 **Figure 5. The apical localization of *hook* and *Bsg25D* RNAs is mechanistically similar to *BicD*.**  
915 A) *Bsg25D* and *hook* RNAs visualized by smFISH in wild-type FE. B-C) Localization of *Bsg25D* and  
916 *hook* RNAs by smFISH in *Dhc* RNAi (B) and *egl* RNAi mosaic tissue (C). Mutant cells are marked by  
917 the expression of CD8-mCherry (lower panels) and highlighted with a dashed line in smFISH images  
918 (upper panels). Neighboring wild-type cells are unmarked. Arrowheads in C) indicate the persistence  
919 of *Bsg25D* and *hook* RNAs apically in *egl* RNAi cells. A continuous yellow line demarcates the border  
920 between the oocyte and the FE to facilitate the image interpretation. D) Quantification of changes in  
921 the A-B distribution of *Bsg25D* and *hook* RNAs in conditions of downregulated dynein/*BicD*/*Egl*  
922 transport. The y-axis shows the average values ( $\pm$  s.e.m) of the KD/wt DoA for each RNA analyzed, in  
923 each condition. The mean KD/wt DoA value for each RNA in each condition was tested against a  
924 value of KD/wt(DoA)=1 (red horizontal line). Asterisks indicate mean values that significantly differ  
925 from the reference value of  $\mu=1$  (\*= $p<0.05$ ; \*\*= $p<0.01$ ; \*\*\*= $p<0.001$ ). E) *Bsg25D* (left panels) and  
926 *hook* (right panels) RNA localization in the FE visualized by smFISH in Control, Puro- or CHX-treated  
927 ovaries. E) Quantification of *Bsg25D* (upper panels) and *hook* (lower panels) RNA distribution along  
928 linear ROIs spanning the apical-basal axis of follicle cells measured as smFISH fluorescence intensity  
929 in control (blue), Puro (yellow) and CHX (grey) conditions. A red vertical line represents the mean x  
930 value corresponding to 50% of each area under the curve (a.u.c.). G) Statistical analysis of *Bsg25D*  
931 and *hook* degree of mislocalization (mean a.u.c.  $\pm$  s.e.m) in each condition compared to control.  
932 Control-Puro(*Bsg25D*):  $p= 0.6869$  (ns); Control-CHX(*Bsg25D*):  $p=0.05405$  (ns), Control-Puro(*hook*):  
933  $p= 0.01648$  (\*); Control-CHX(*hook*):  $p= 0.9412$  (ns). H-I) Localization of *Bsg25D* RNA (H) or *hook* RNA  
934 (I) (magenta), *Dhc* RNA (cyan), and endogenously tagged *Dhc*-GFP (green) in stage 10 follicular  
935 epithelium. Insets show a magnification of a single *Dhc*-GFP/*Dhc* RNA focus. A dashed line indicates  
936 the cross-section along which each signal has been measured (panels i-iv). Signal intensities (y-axis)  
937 and line length (x-axis) were normalized in the 0-1 range. Nuclei (cyan) are stained with DAPI. Scale  
938 bars 10  $\mu\text{m}$  unless otherwise specified.  
939

940 **Figure 6**

941

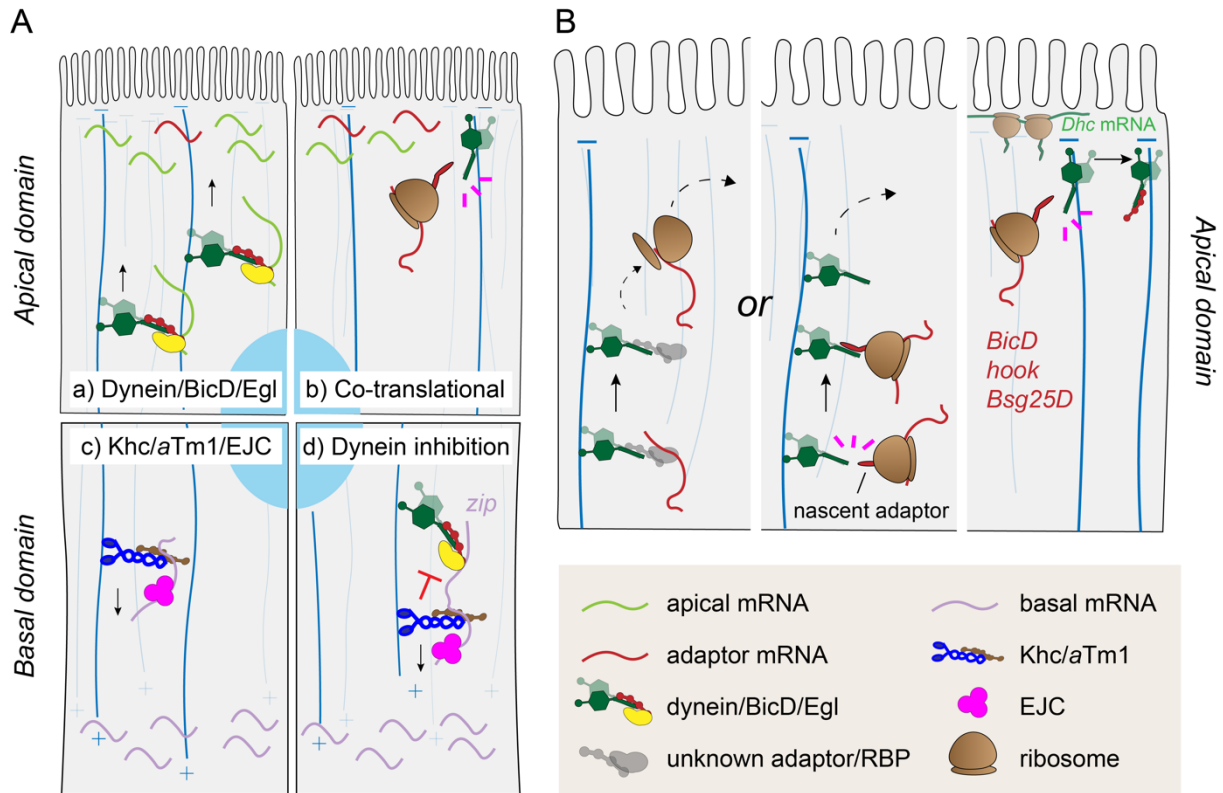

942

943

944

945 **Figure 6. Models of RNA localization mechanisms in follicle cells.** A) Model of the mechanism  
946 underlying apical (a-b) and basal (c-d) RNA localization. Apical RNAs are localized at MT minus ends  
947 by two dynein-dependent mechanisms: a) the dynein/BicD/Egl RNA transport machinery localizes  
948 most of apical RNAs in the FE; b) a subset of dynein adaptor RNAs (*BicD*, *Bsg25D*, and *hook*)  
949 localize co-translationally at cortical dynein foci. c) Basal RNAs are localized by Khc/aTm1/EJC  
950 moving towards MT plus ends enriched basally. d) In the transport of basal RNAs, the dynein complex  
951 is kept in an inhibited state by kinesin-1 and its regulators. B) Model for the apical localization of  
952 adaptor RNAs. RNAs can reach the apical domain by either canonical RNA transport by an unknown  
953 RBP complex or by interaction of the nascent adaptor protein with dynein/dynactin transporting the  
954 translationally engaged RNA to the apical domain. Once at the apical cortex, the nascent adaptor  
955 associates through its N-terminal domain with newly translated cortically-anchored dynein, presumably  
956 allowing the relief of both proteins' autoinhibition.  
957
